# Supplementary material for: The Ethanolic Extract of Lindera aggregata Modulates Gut Microbiota Dysbiosis and Alleviates Ethanol‐Induced Acute Liver Inflammation and Oxidative Stress SIRT1/Nrf2/NF‐κB Pathway
Source: Hindawi journal article supplement (doi:10.1155/2022/6256450), 2022-01-01

# Cladogram

■ LGL  
■ Model

■ a: g\_\_Ruminococcus\_1  
■ b: f\_\_Erysipelotrichaceae  
■ c: o\_\_Erysipelotrichales  
■ d: c\_\_Erysipelotrichia  
■ e: g\_\_Akkermansia  
■ f: f\_\_Akkermansiaceae  
■ g: o\_\_Verrucomicrobiales  
■ h: c\_\_Verrucomicrobiae  
■ i: p\_\_Verrucomicrobia

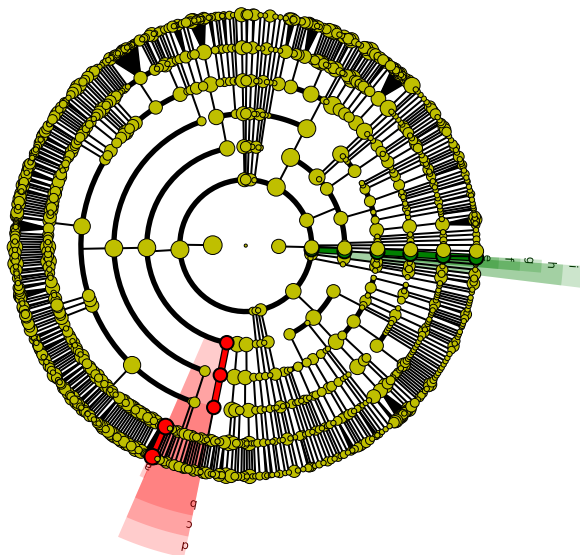

Supplement: f1 [file 6256450.f1.zip]
