# Supplementary material for: The Ethanolic Extract of Lindera aggregata Modulates Gut Microbiota Dysbiosis and Alleviates Ethanol‐Induced Acute Liver Inflammation and Oxidative Stress SIRT1/Nrf2/NF‐κB Pathway
Source: Hindawi journal article supplement (doi:10.1155/2022/6256450), 2022-01-01
Supplement: f1 [file 6256450.f1.zip]

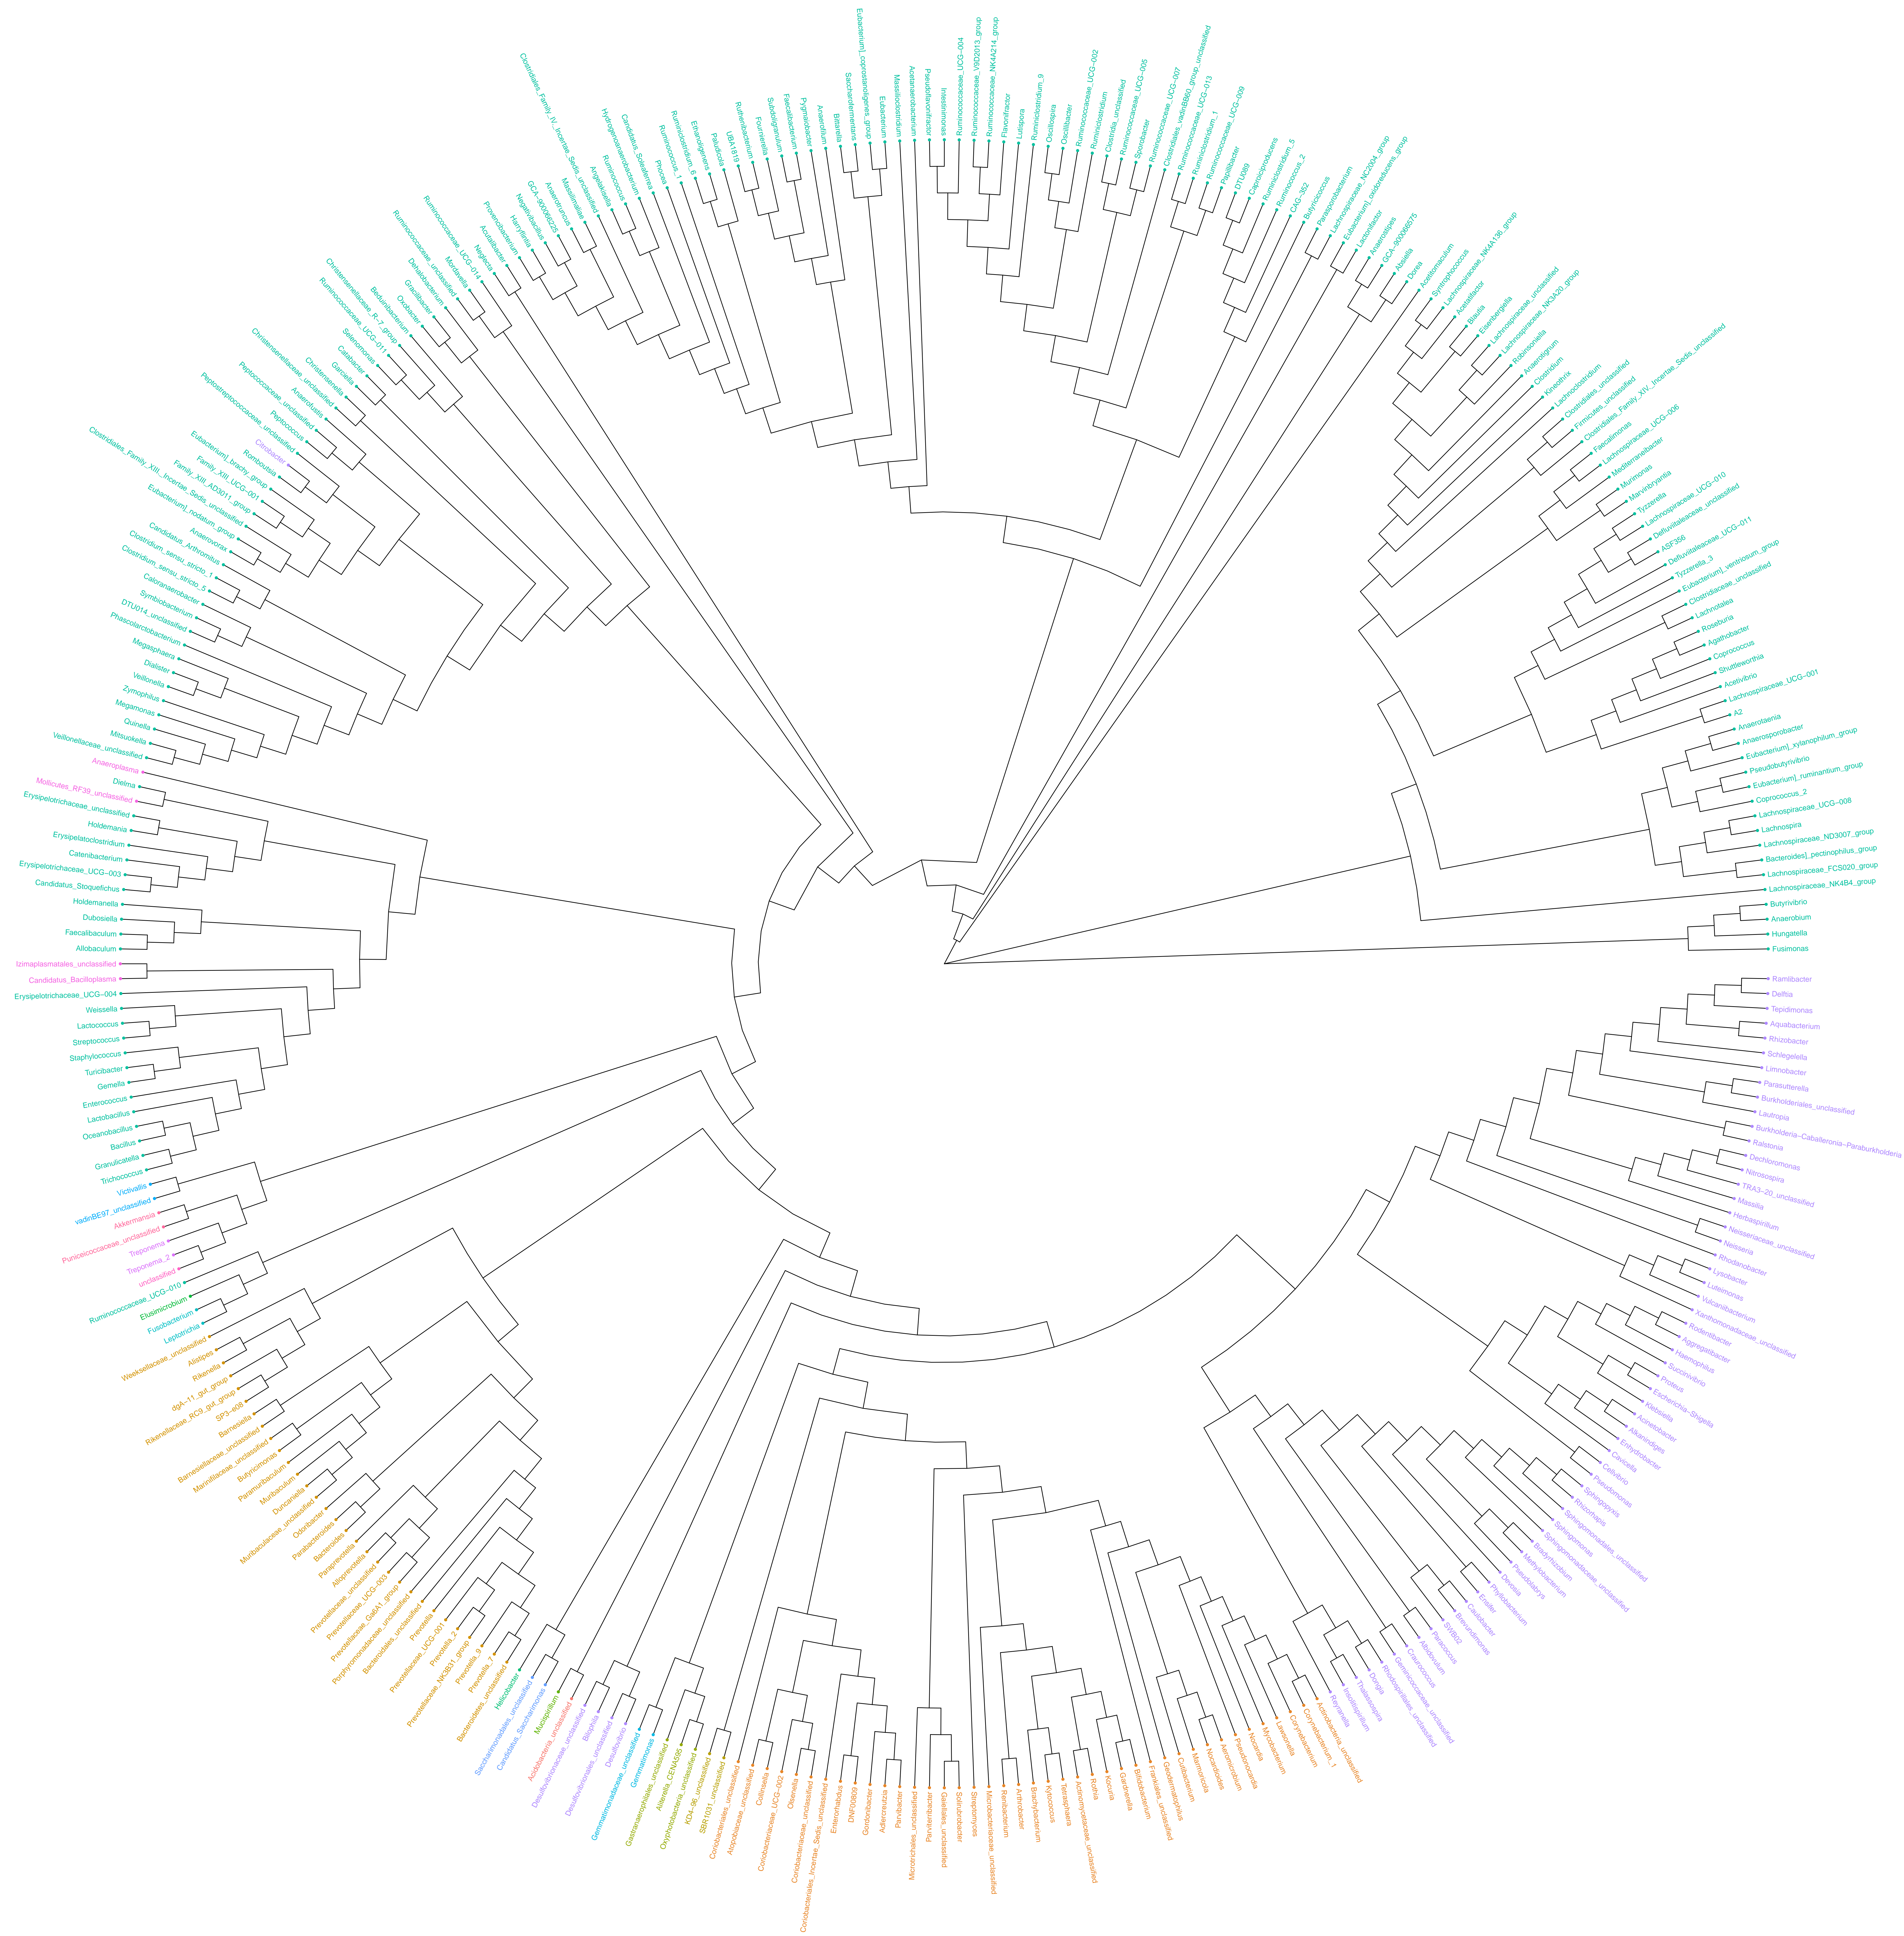

## Phylum

- Acidobacteria
- Actinobacteria
- Bacteroidetes
- Chloroflexi
- Cyanobacteria
- Deferribacteres
- Elusimicrobia
- Epsilonbacteraeota
- Firmicutes
- Fusobacteria
- Gemmatimonadetes
- Lentisphaerae
- Patescibacteria
- Proteobacteria
- Spirochaetes
- Tenericutes
- unclassified
- Verrucomicrobia
