# Supplementary material for: The Ethanolic Extract of Lindera aggregata Modulates Gut Microbiota Dysbiosis and Alleviates Ethanol‐Induced Acute Liver Inflammation and Oxidative Stress SIRT1/Nrf2/NF‐κB Pathway
Source: Hindawi journal article supplement (doi:10.1155/2022/6256450), 2022-01-01

# Cladogram

Model  
Normal

a: g\_\_Bifidobacterium  
b: f\_\_Bifidobacteriaceae  
c: o\_\_Bifidobacteriales  
d: g\_\_Coprococcus\_2  
e: g\_\_Ruminiclostridium\_6

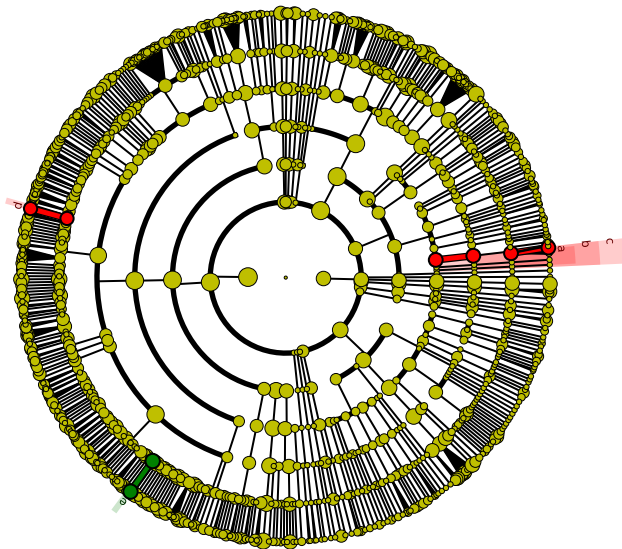

Supplement: f1 [file 6256450.f1.zip]
