# Supplementary material for: The Ethanolic Extract of Lindera aggregata Modulates Gut Microbiota Dysbiosis and Alleviates Ethanol‐Induced Acute Liver Inflammation and Oxidative Stress SIRT1/Nrf2/NF‐κB Pathway
Source: Hindawi journal article supplement (doi:10.1155/2022/6256450), 2022-01-01

# Cladogram

█ LGH  
█ Model

a: g\_\_Coprococcus\_2  
 b: g\_\_GCA\_900066575  
 c: g\_\_Roseburia  
 d: g\_\_Ruminococcaceae\_unclassified  
 e: g\_\_Ruminococcus\_2  
 f: g\_\_Mollicutes\_RF39\_unclassified  
 g: f\_\_Mollicutes\_RF39\_unclassified  
 h: o\_\_Mollicutes\_RF39

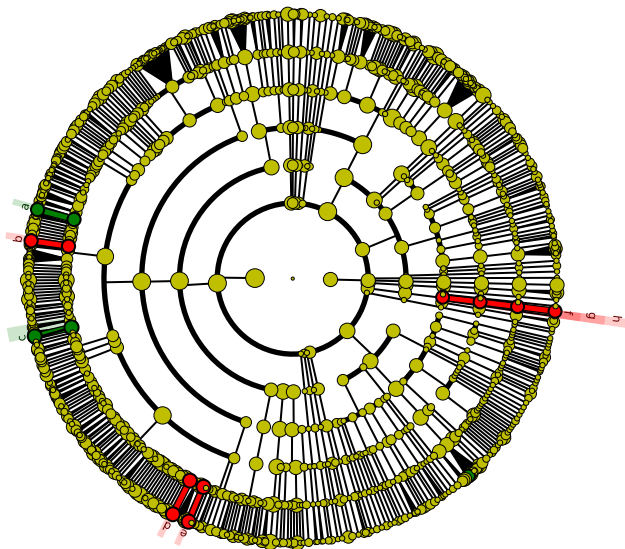

Supplement: f1 [file 6256450.f1.zip]
