# Supplementary figures and images for: The Ethanolic Extract of Lindera aggregata Modulates Gut Microbiota Dysbiosis and Alleviates Ethanol‐Induced Acute Liver Inflammation and Oxidative Stress SIRT1/Nrf2/NF‐κB Pathway
Source: Hindawi journal article supplement (doi:10.1155/2022/6256450), 2022-01-01

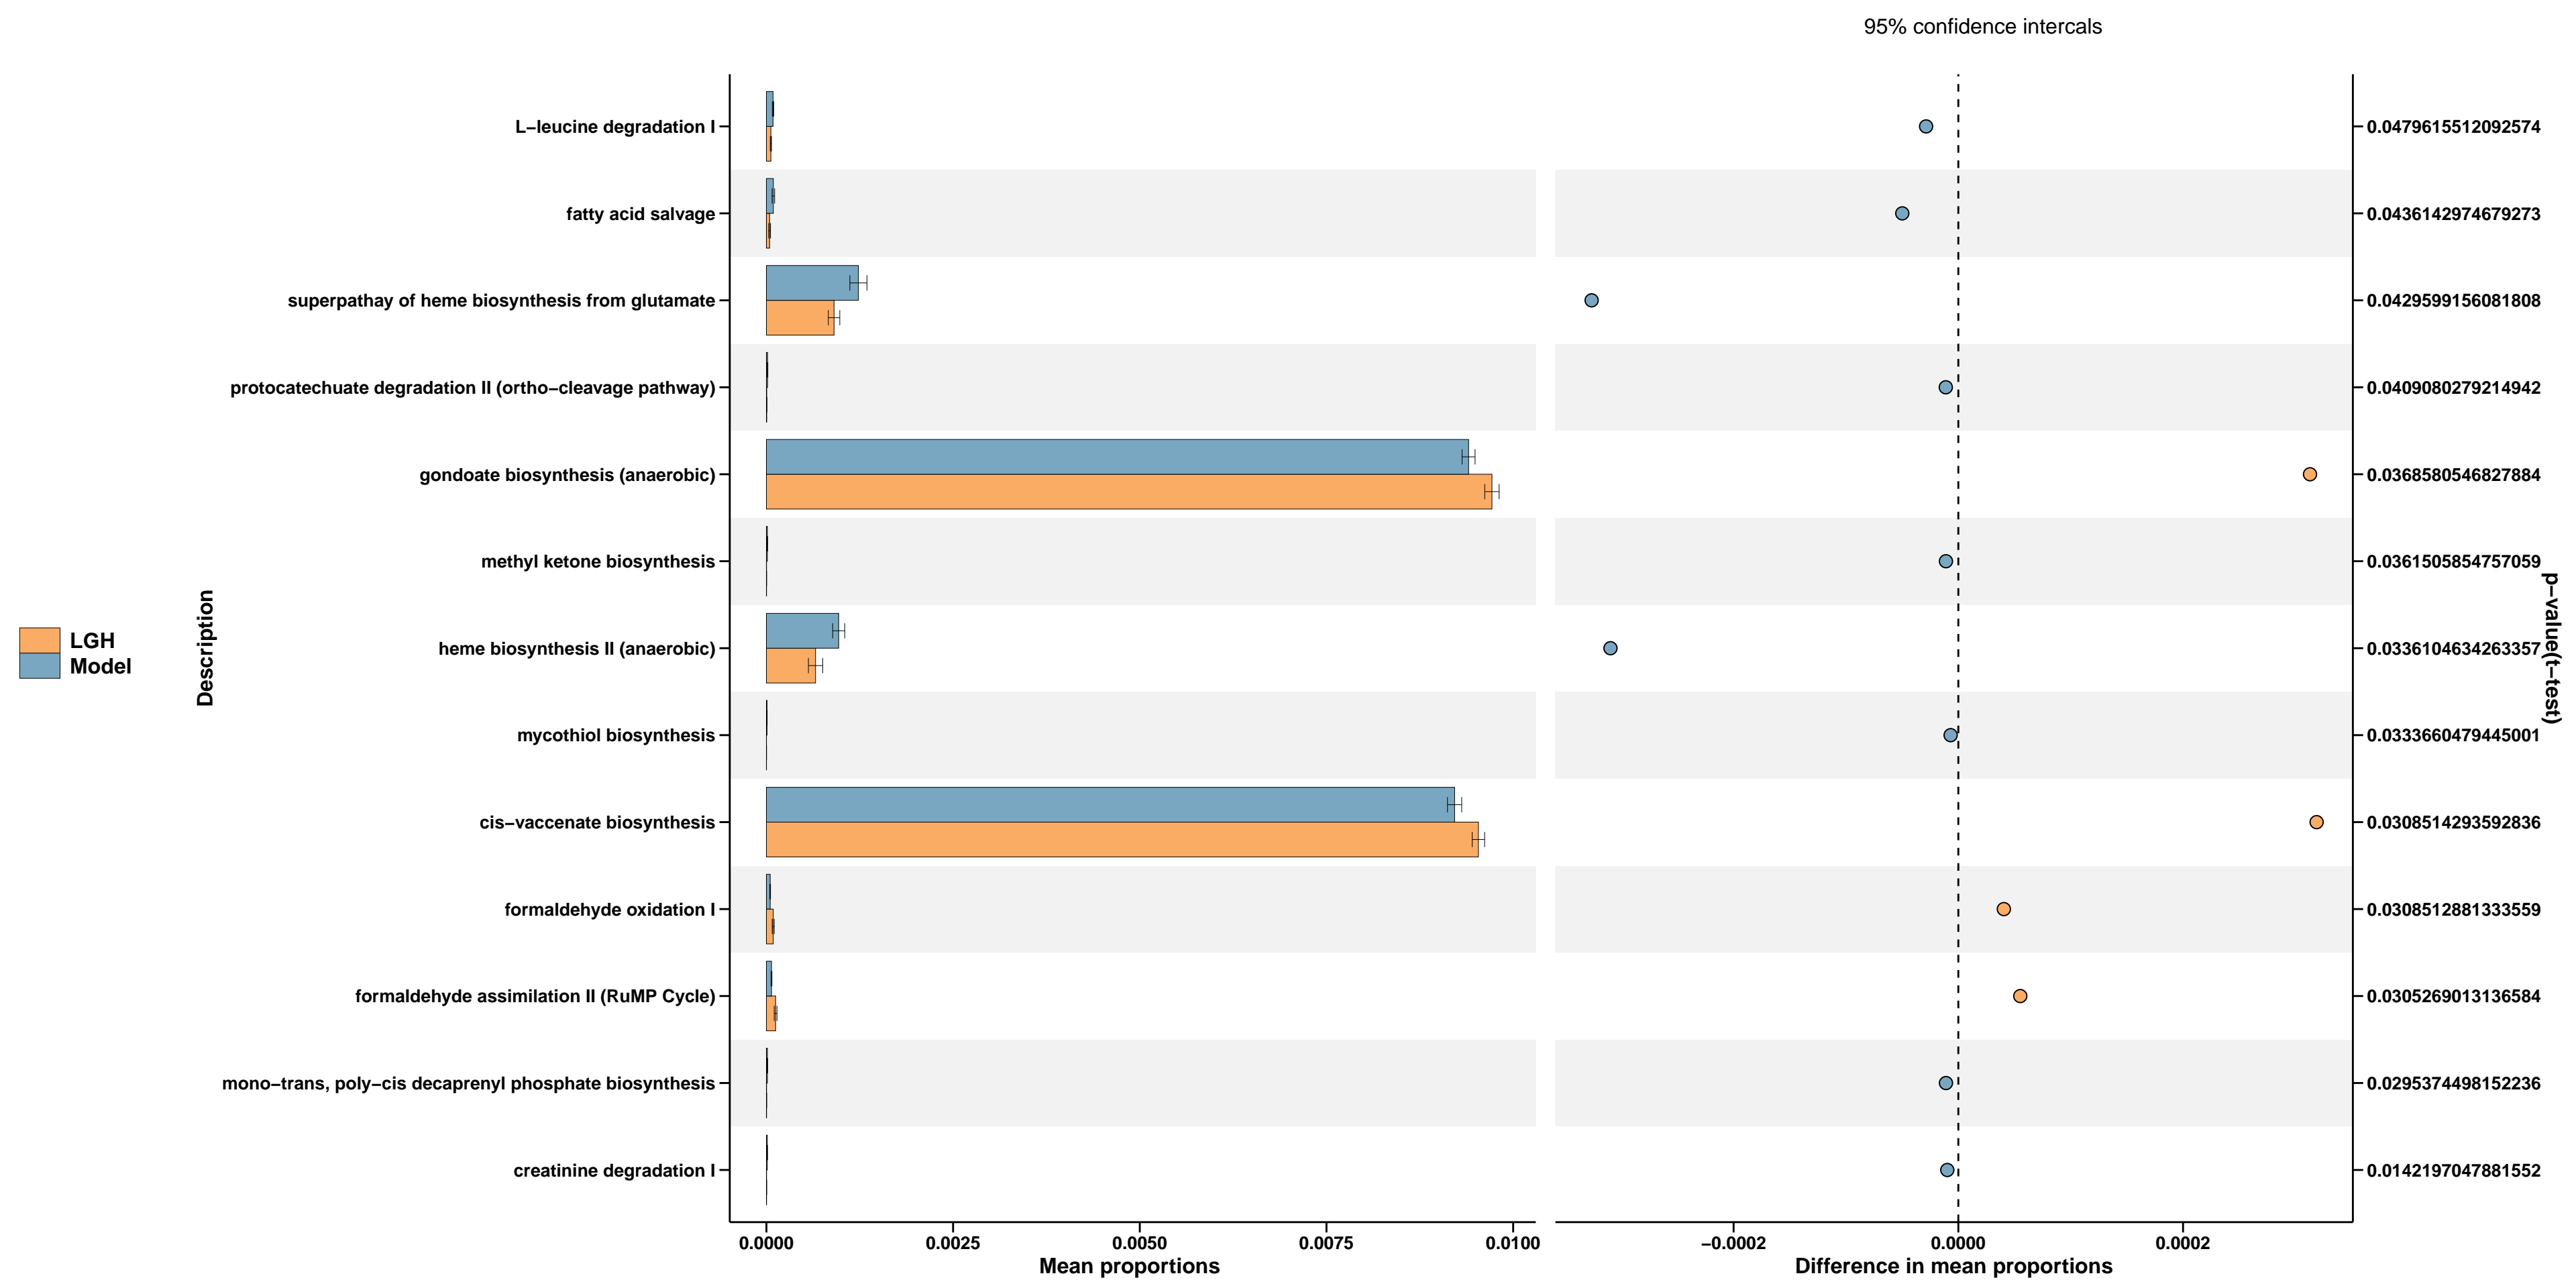

Supplement: f1 [file 6256450.f1.zip]

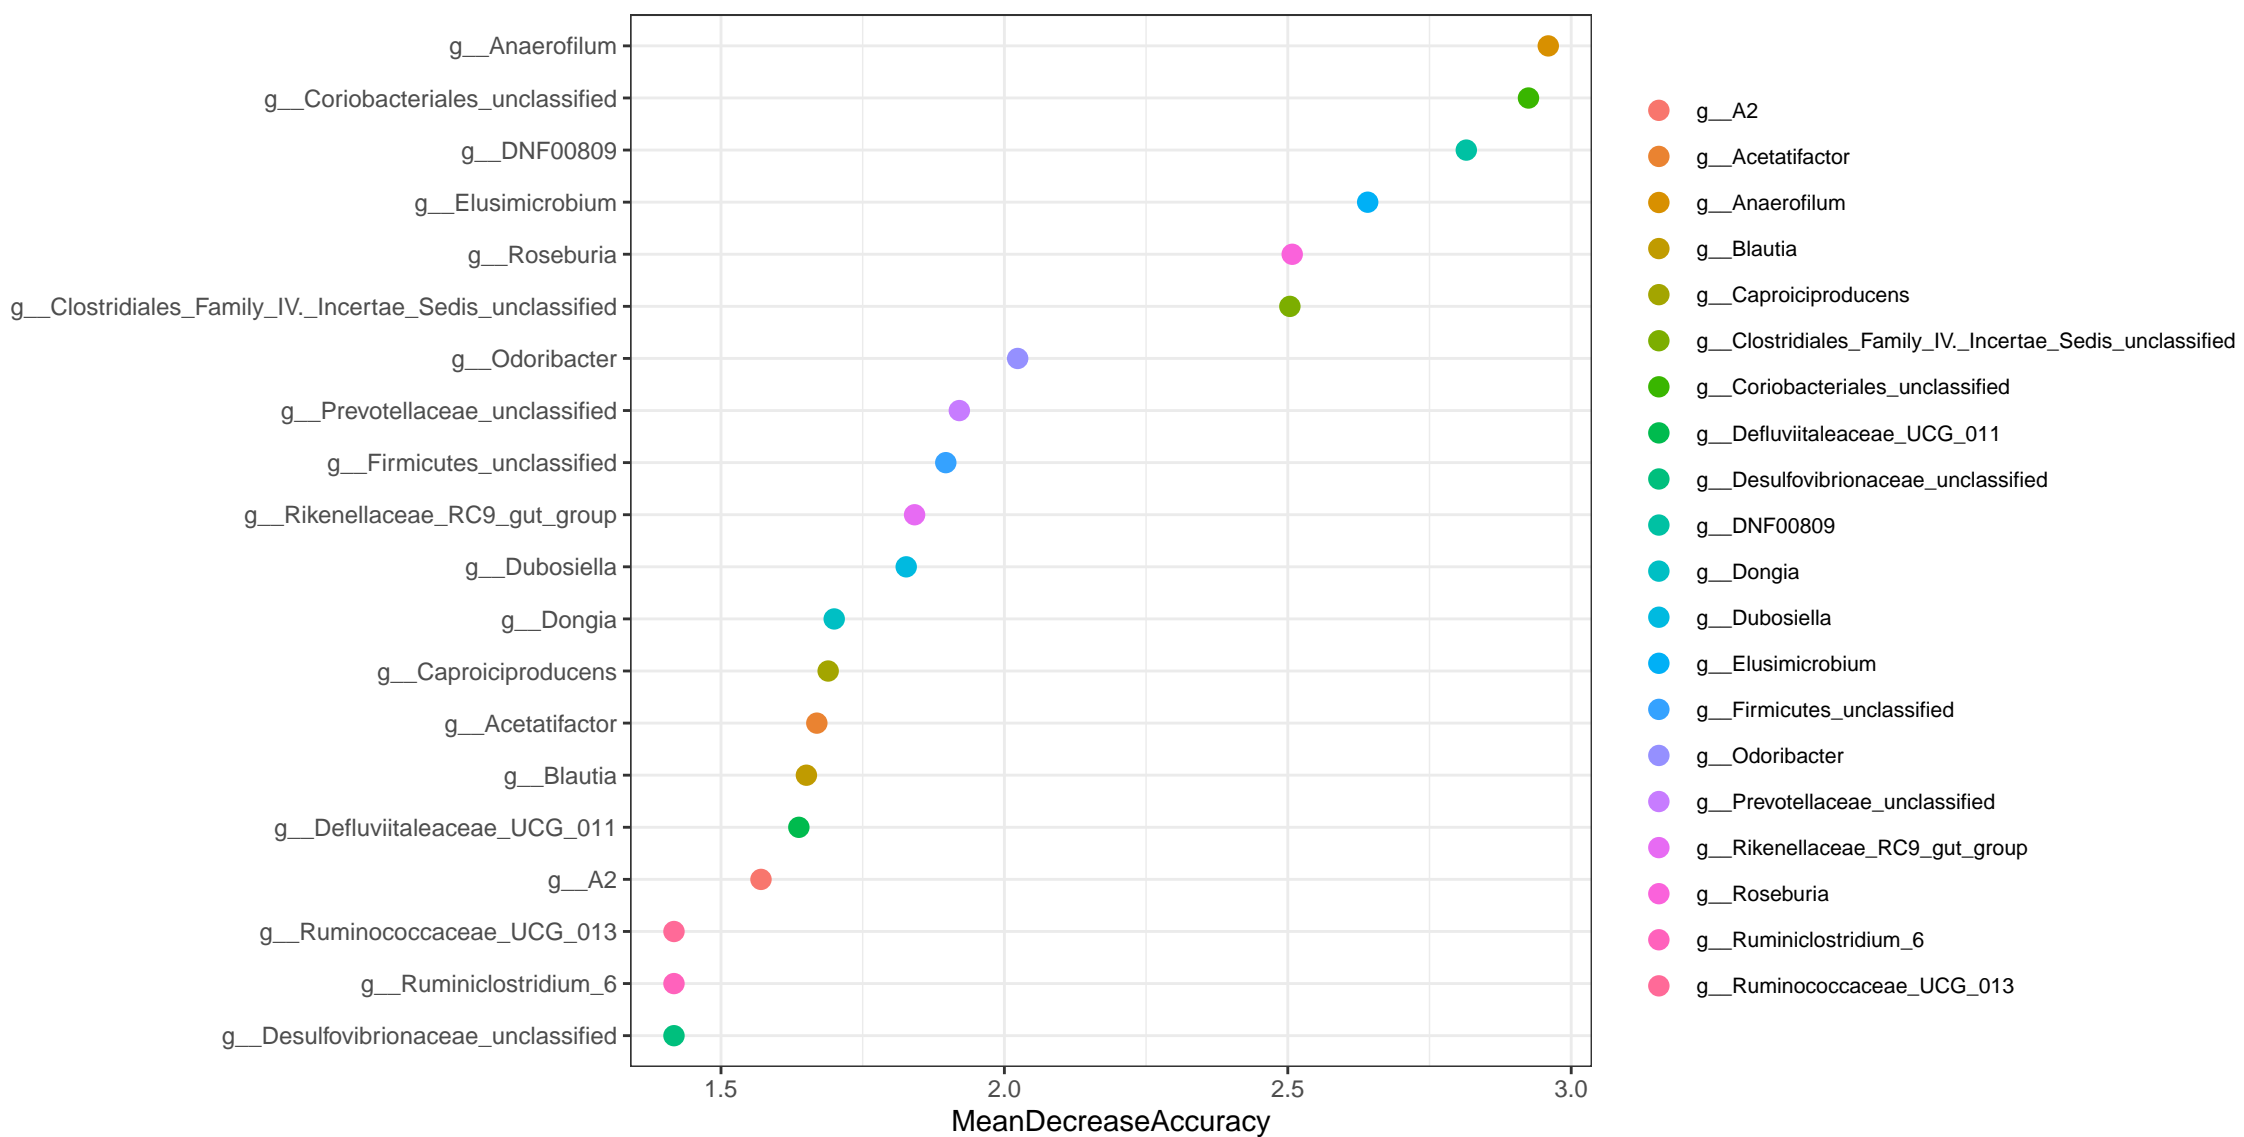

Supplement: f1 [file 6256450.f1.zip]

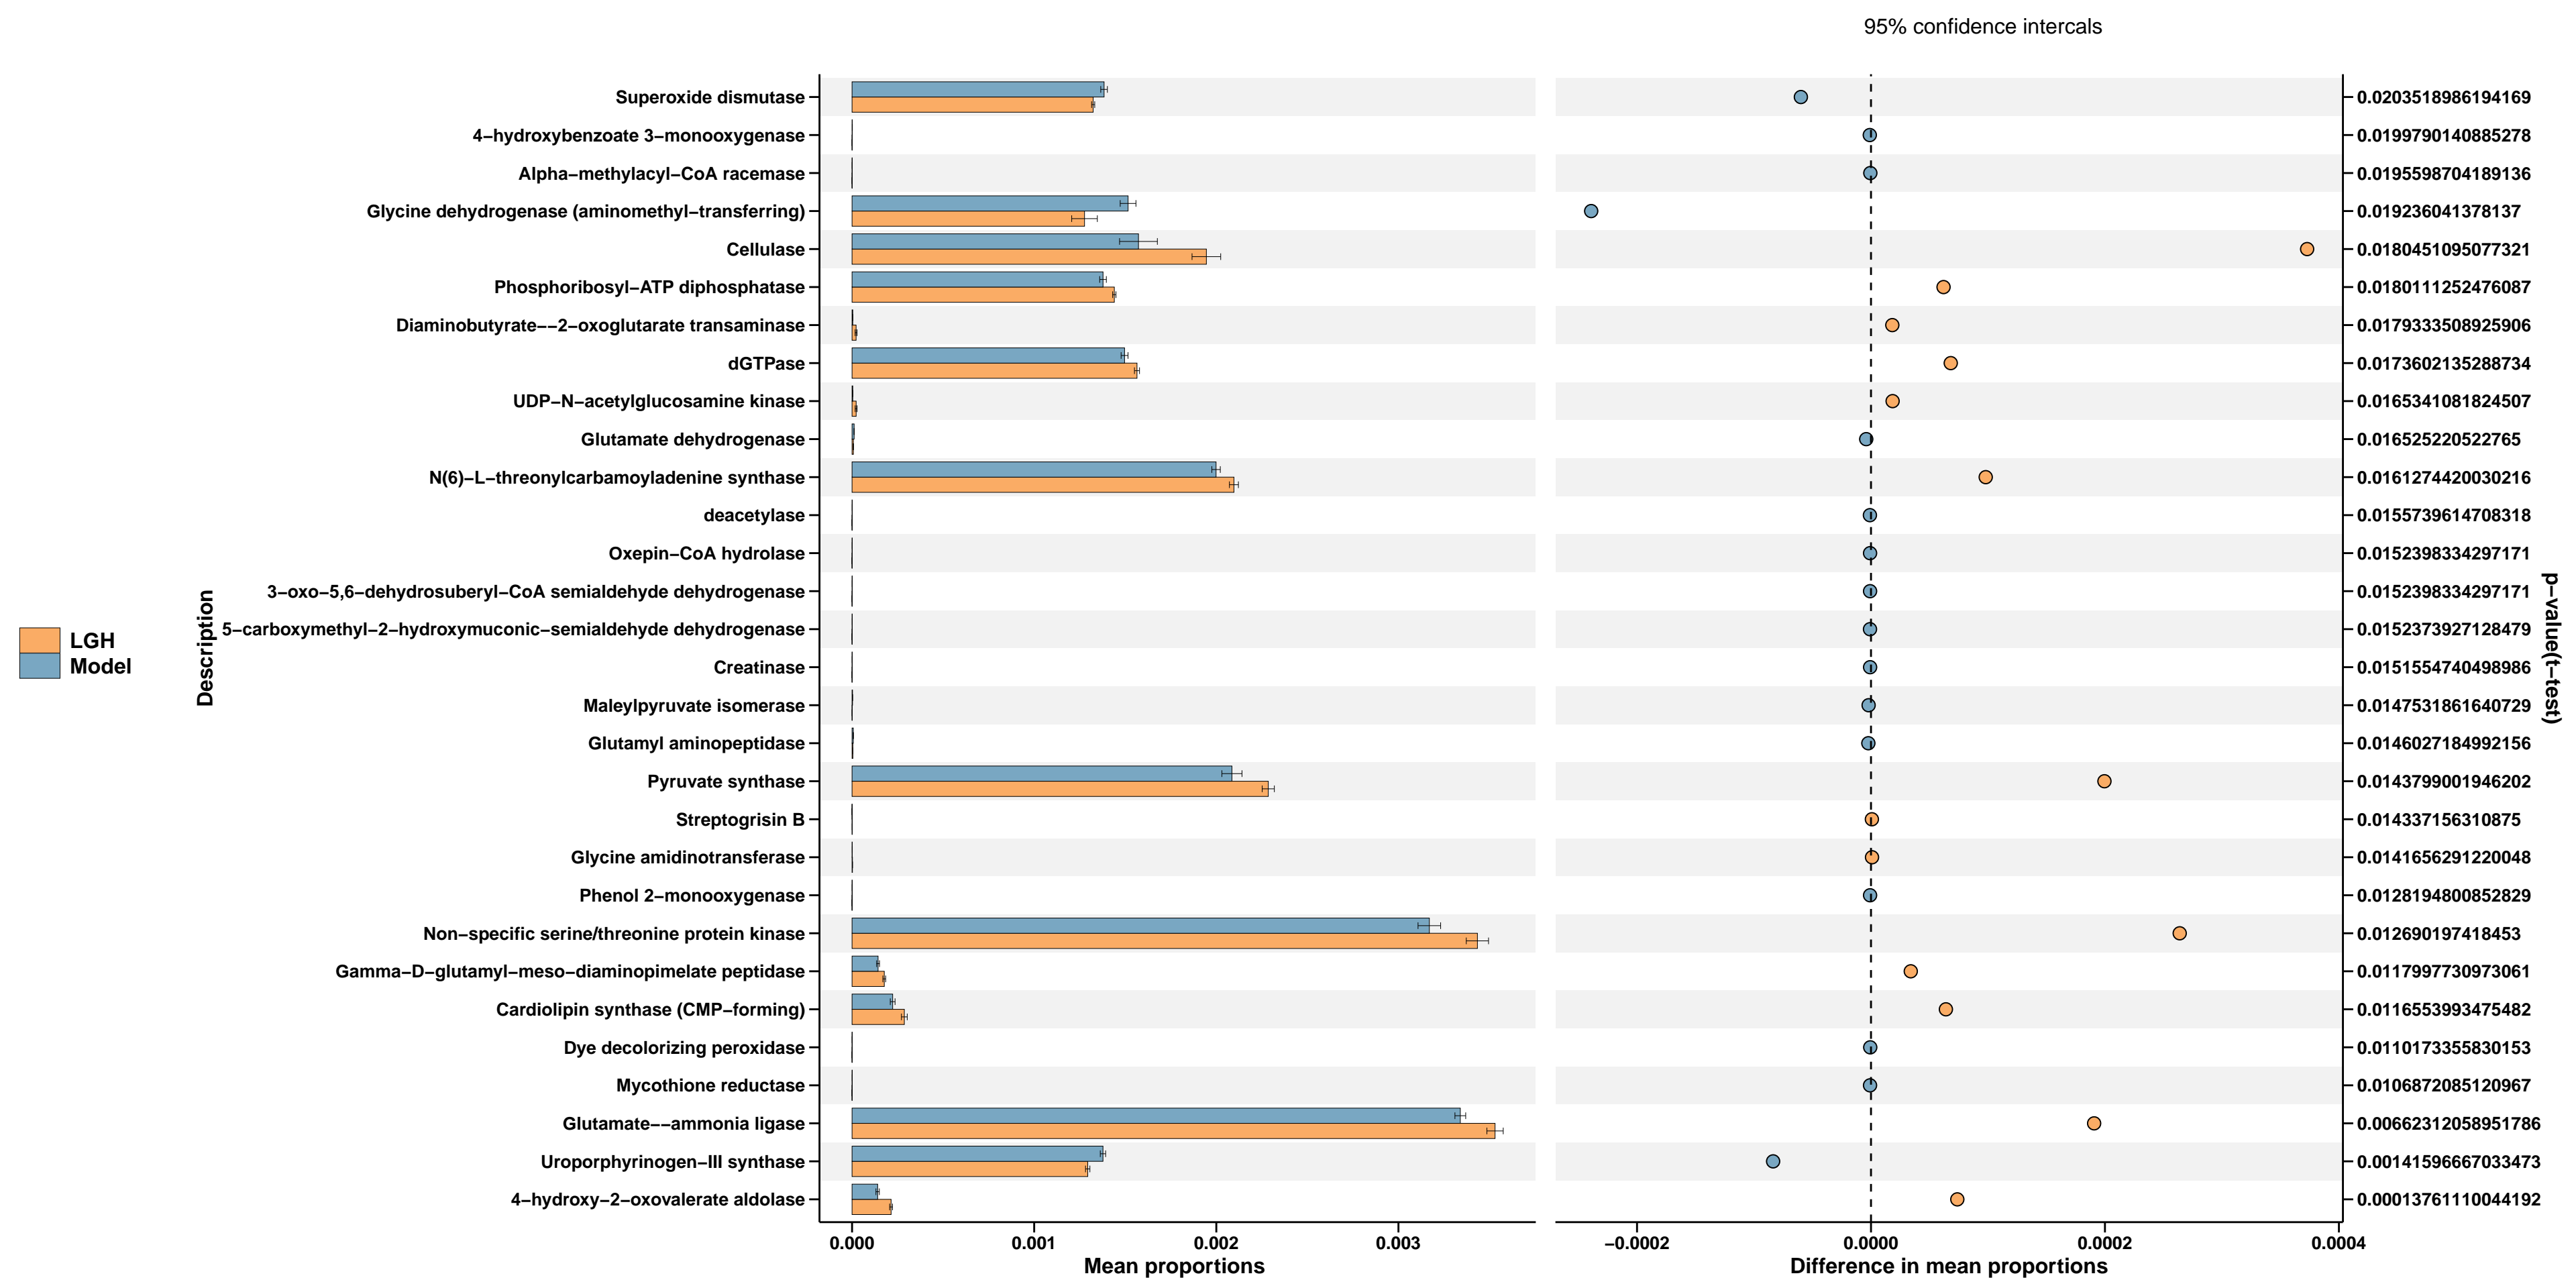

Supplement: f1 [file 6256450.f1.zip]

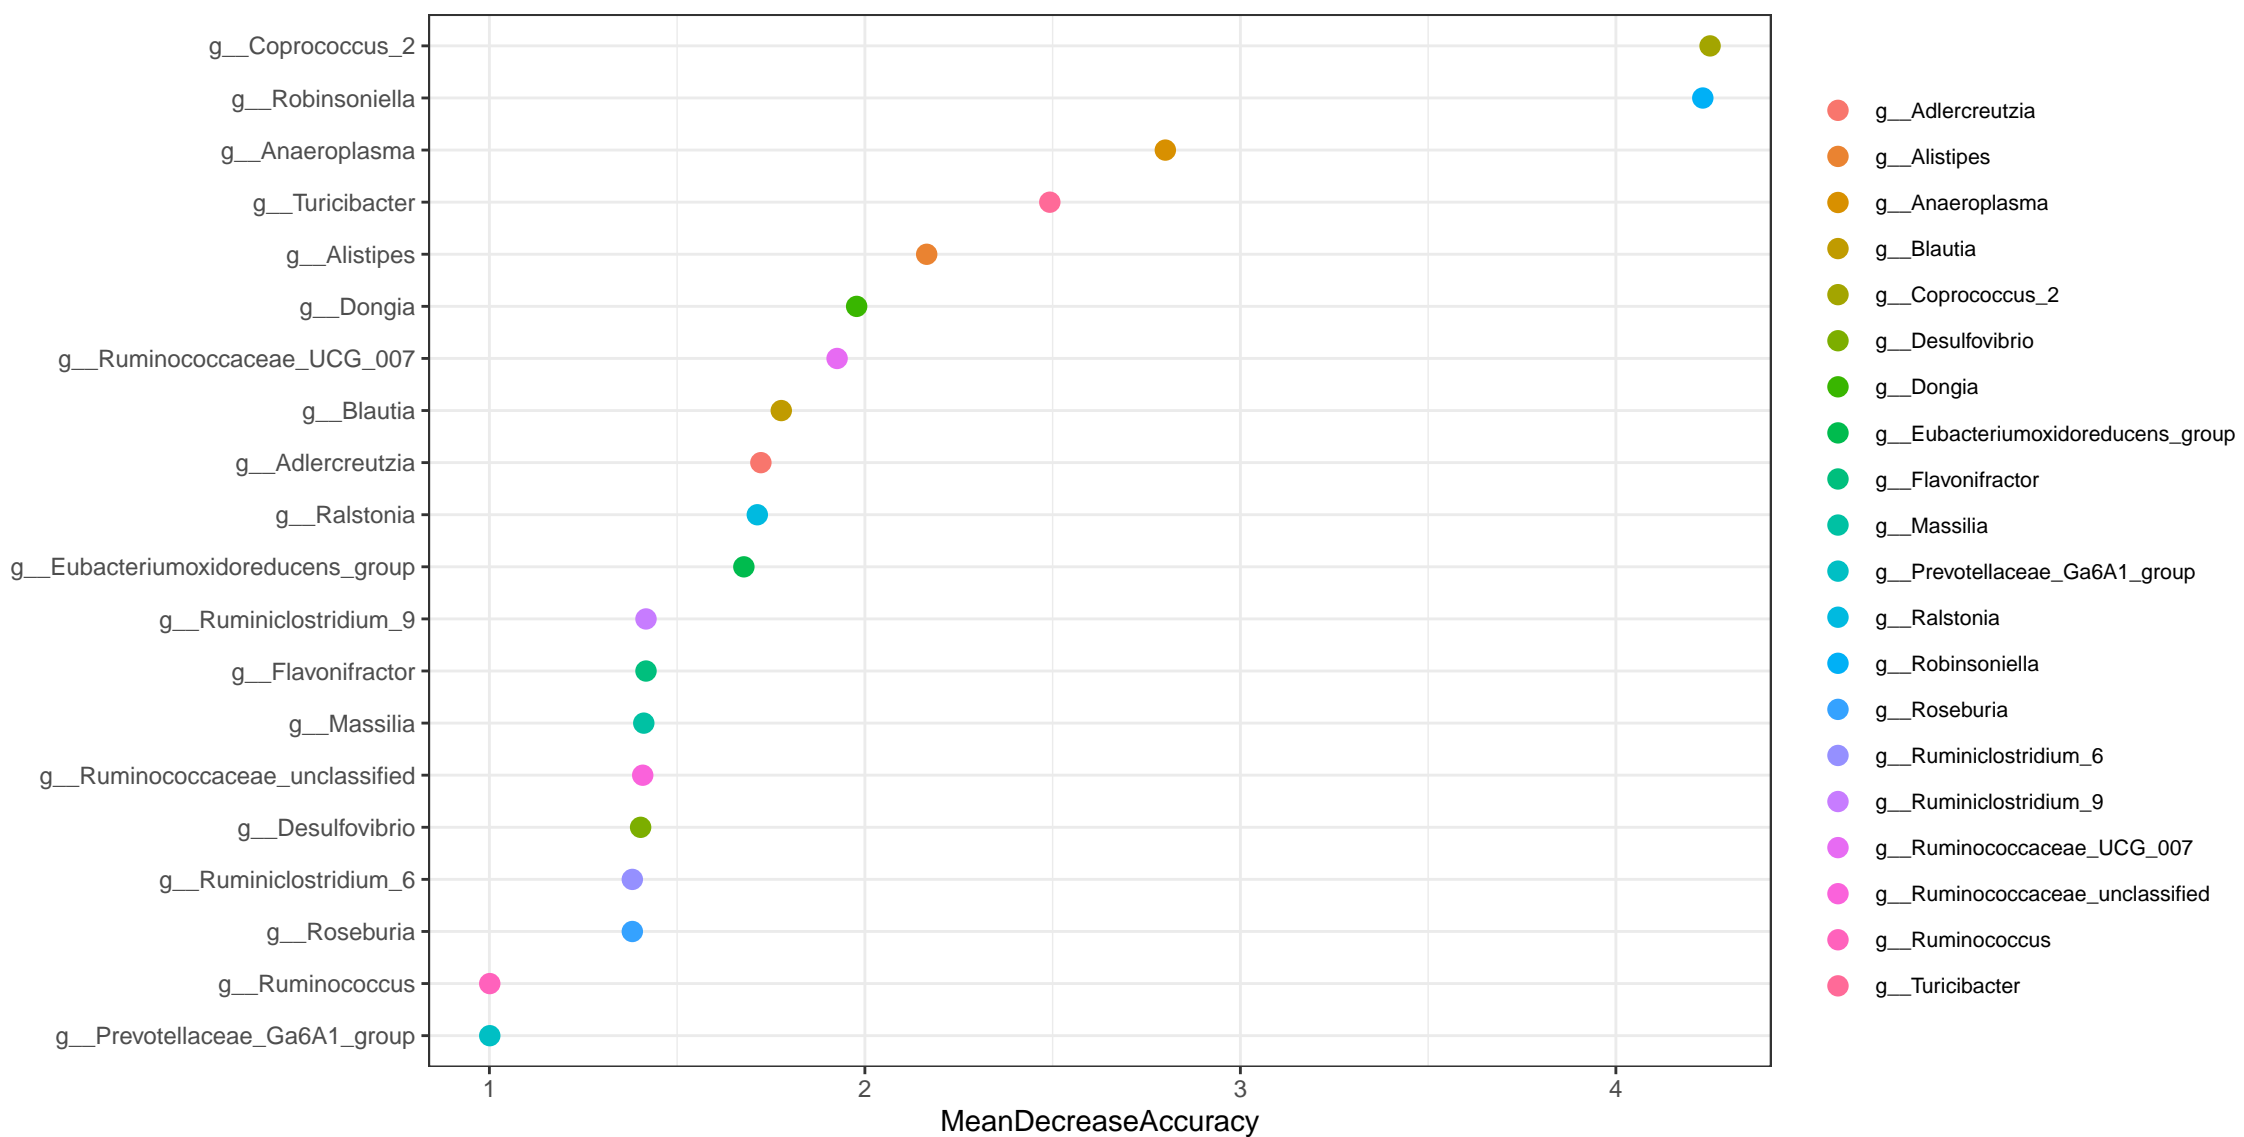

Supplement: f1 [file 6256450.f1.zip]

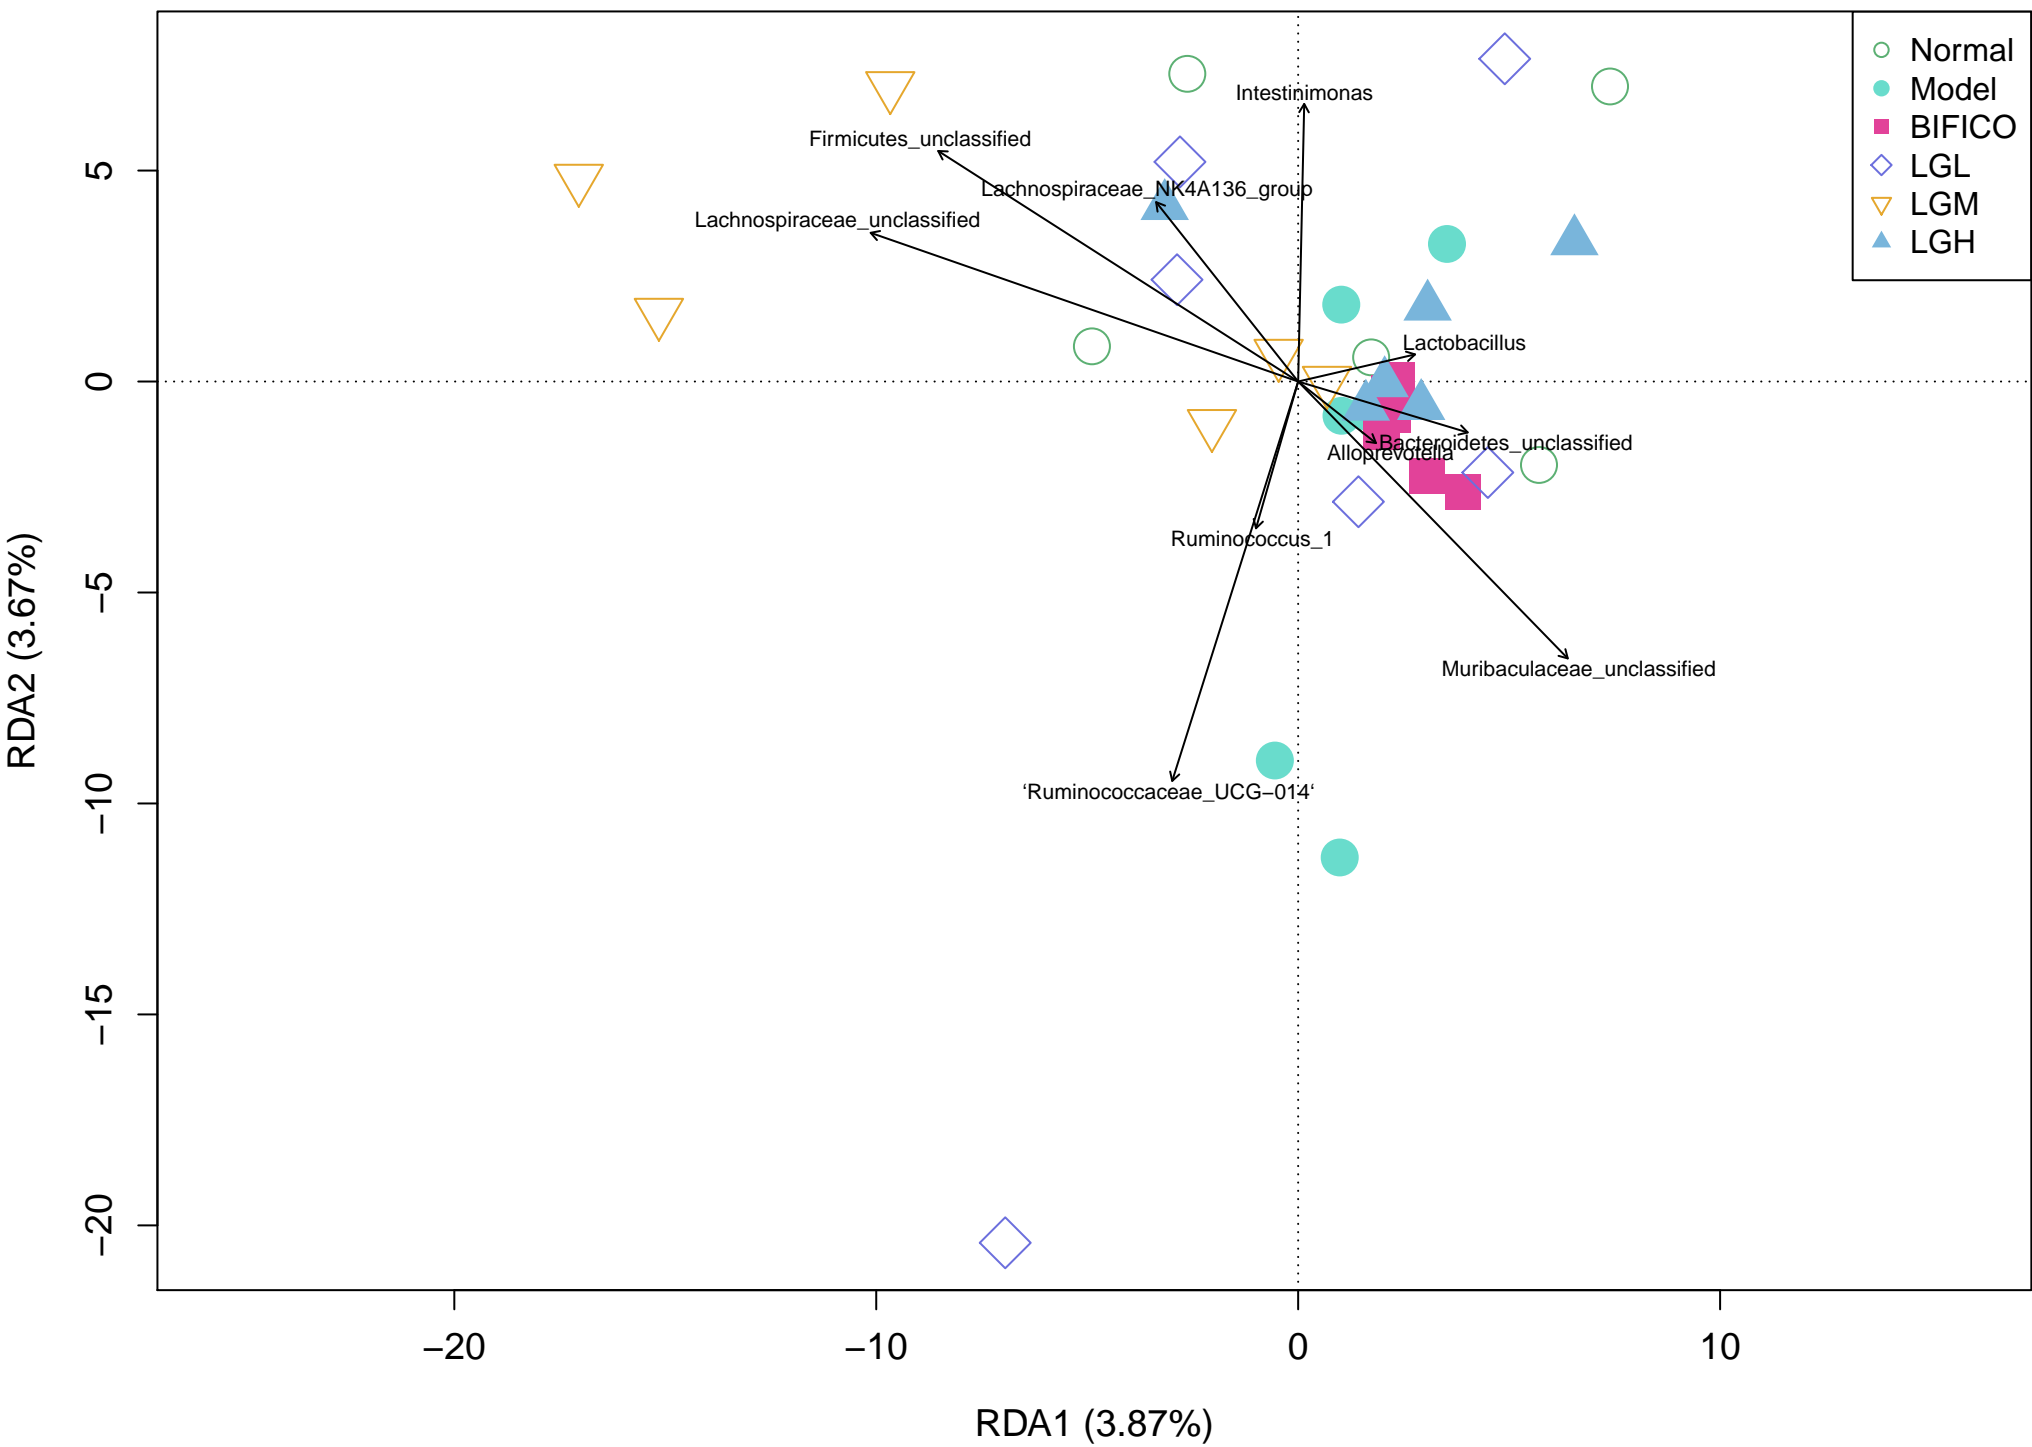

Supplement: f1 [file 6256450.f1.zip]

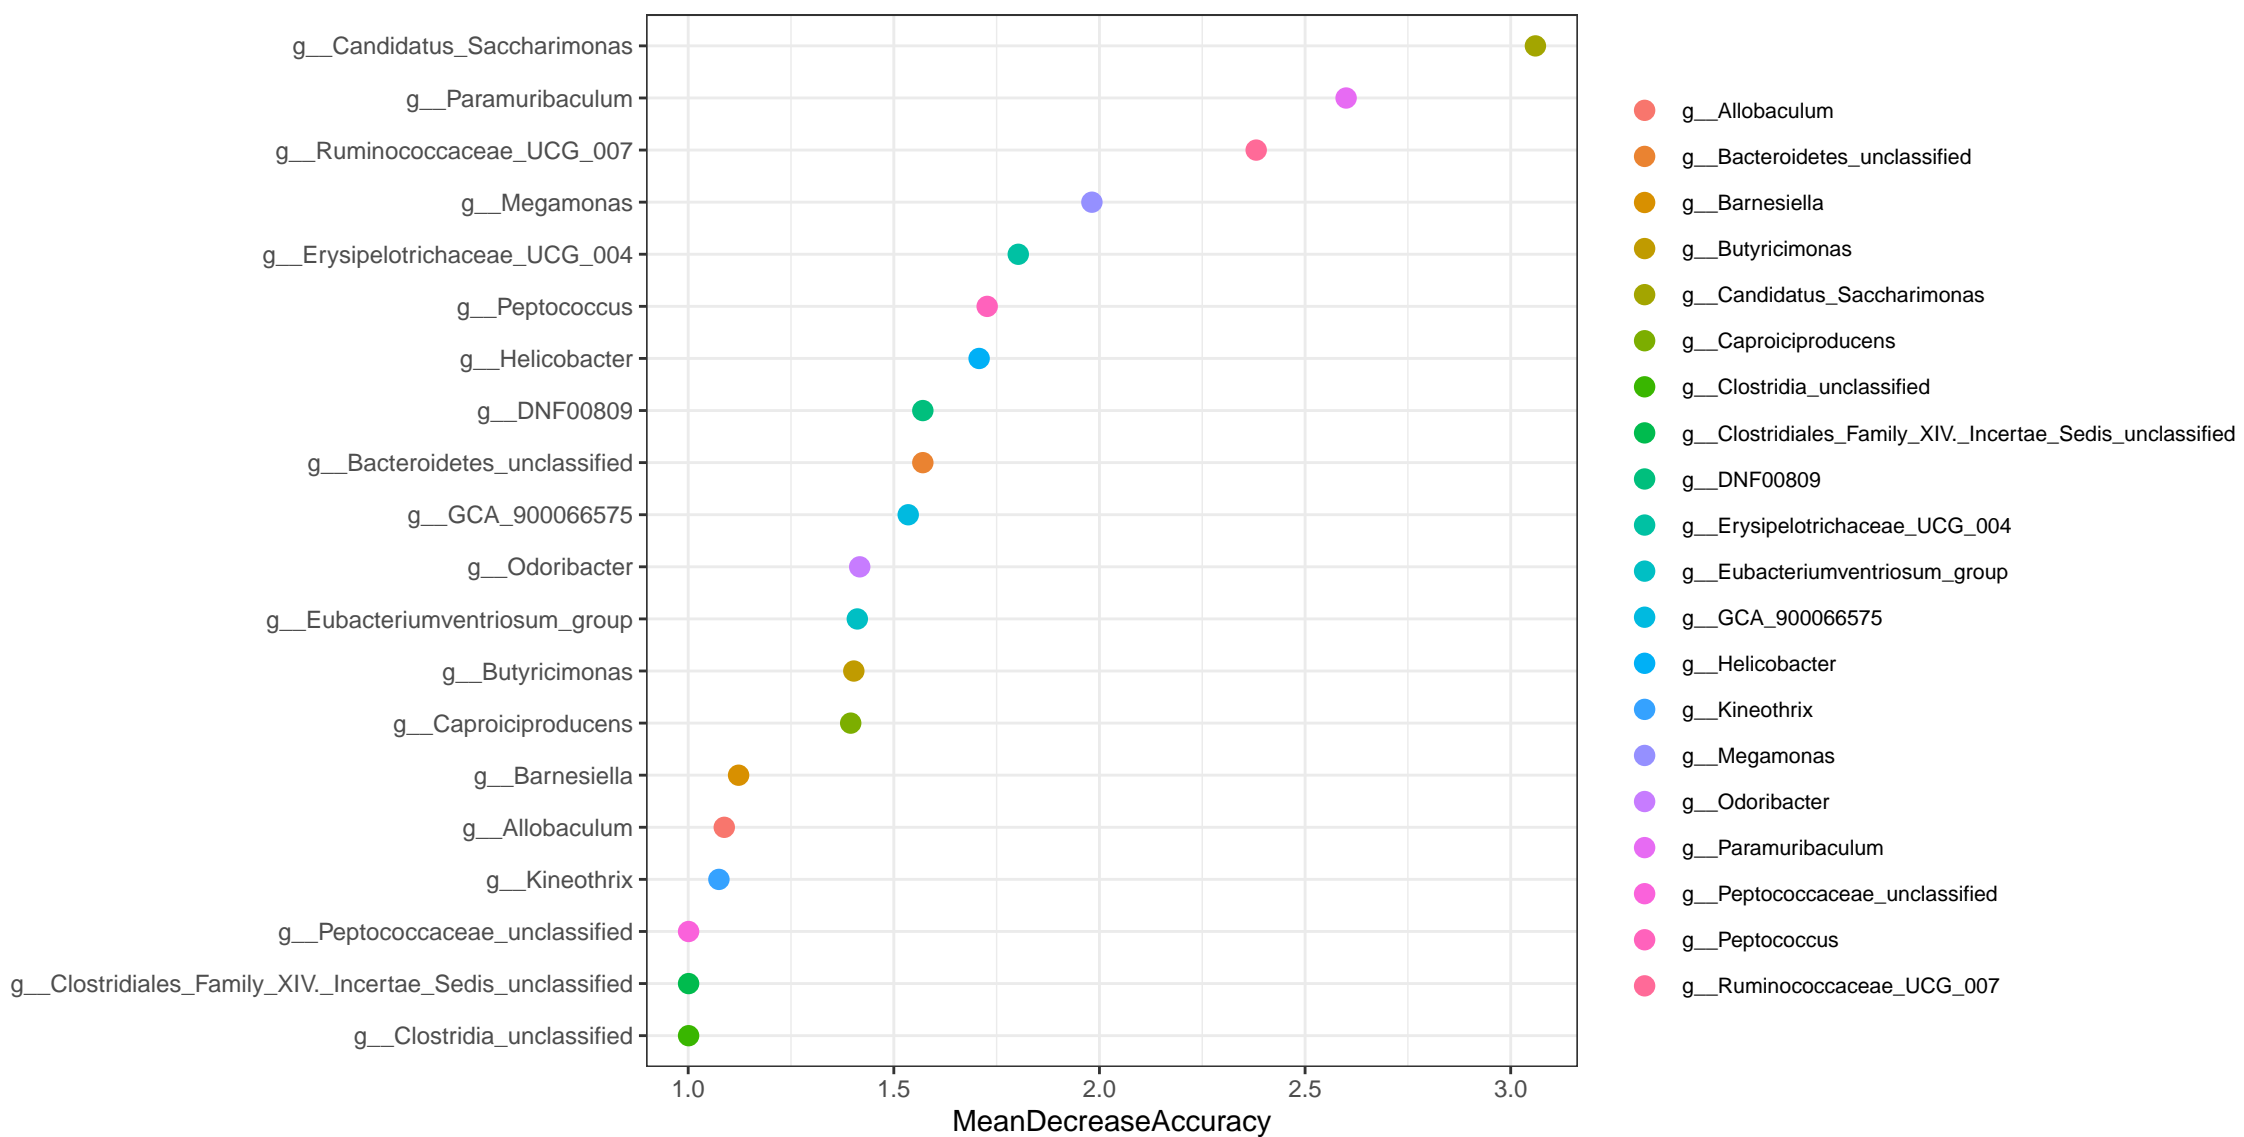

Supplement: f1 [file 6256450.f1.zip]

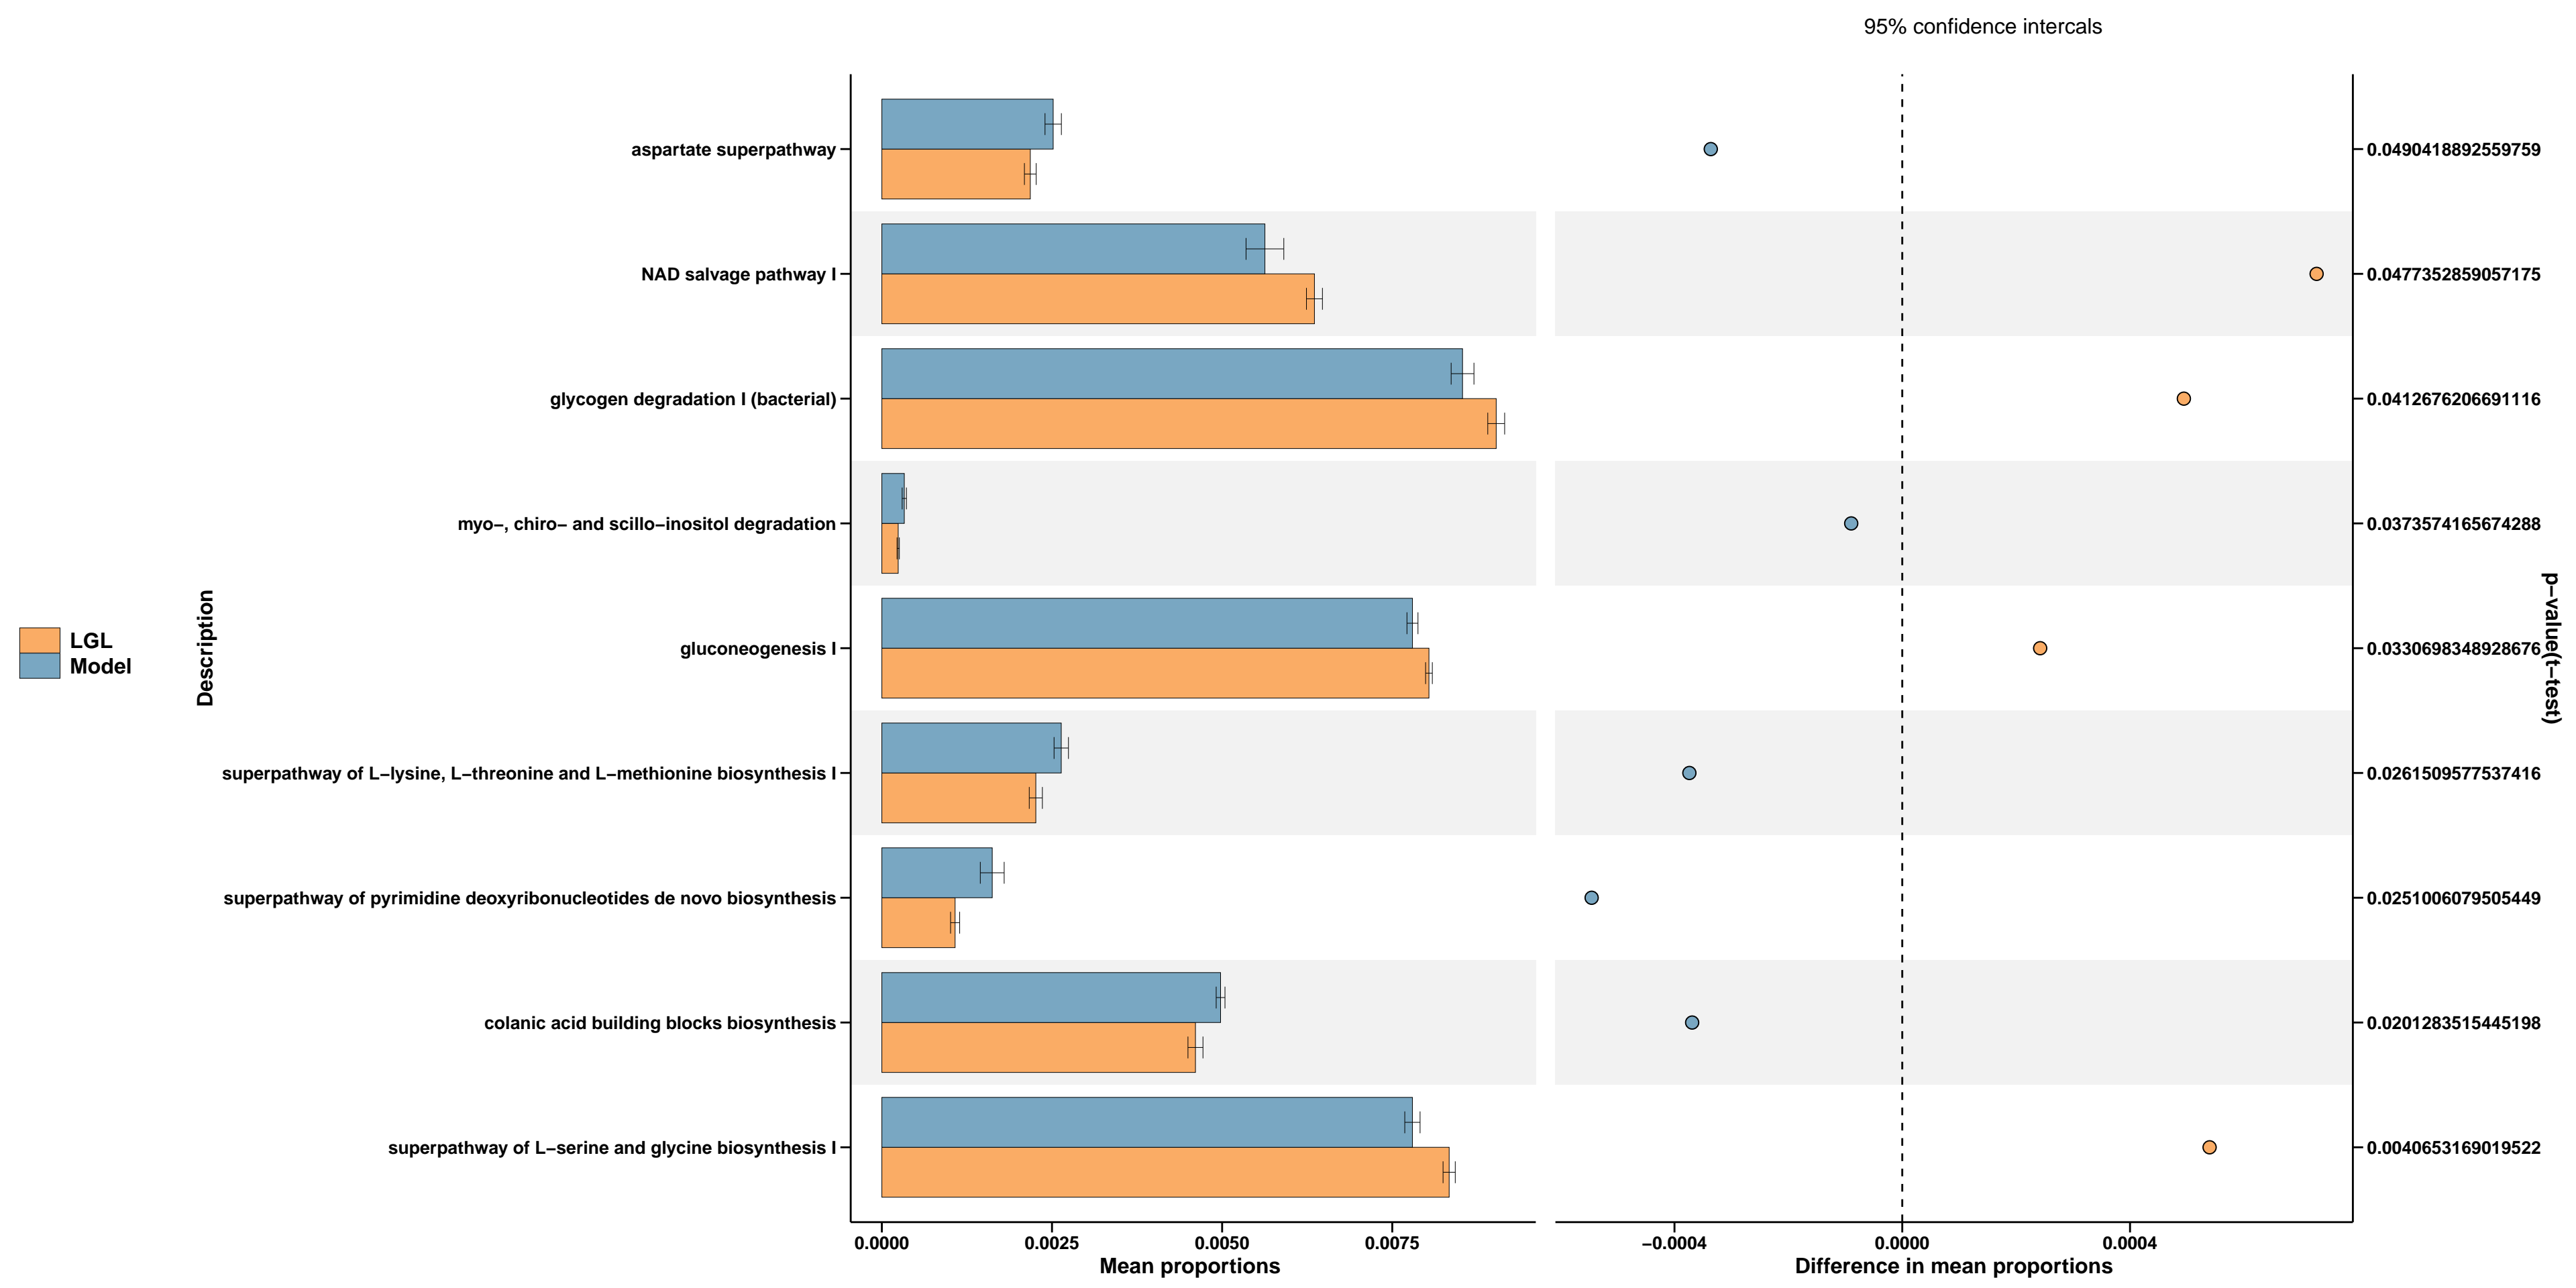

Supplement: f1 [file 6256450.f1.zip]

# Cladogram

■ BIFICO  
■ Model

■ a: g\_\_Prevotellaceae\_Ga6A1\_group  
■ b: g\_\_Roseburia

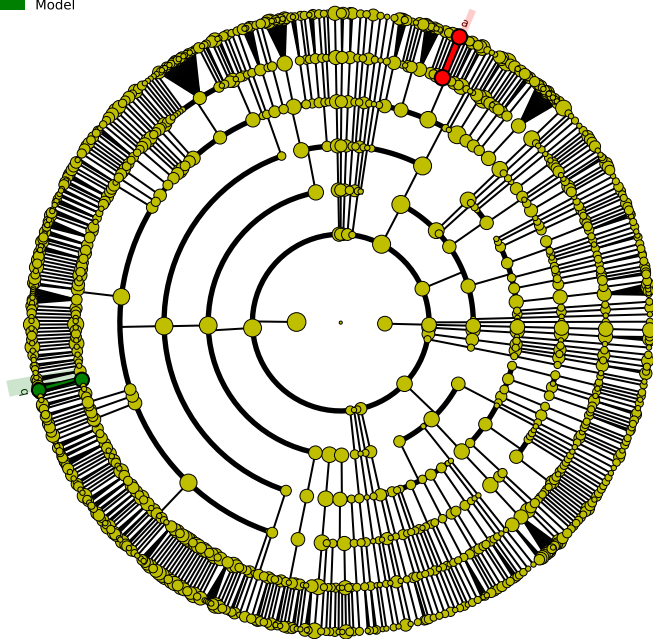

Supplement: f1 [file 6256450.f1.zip]

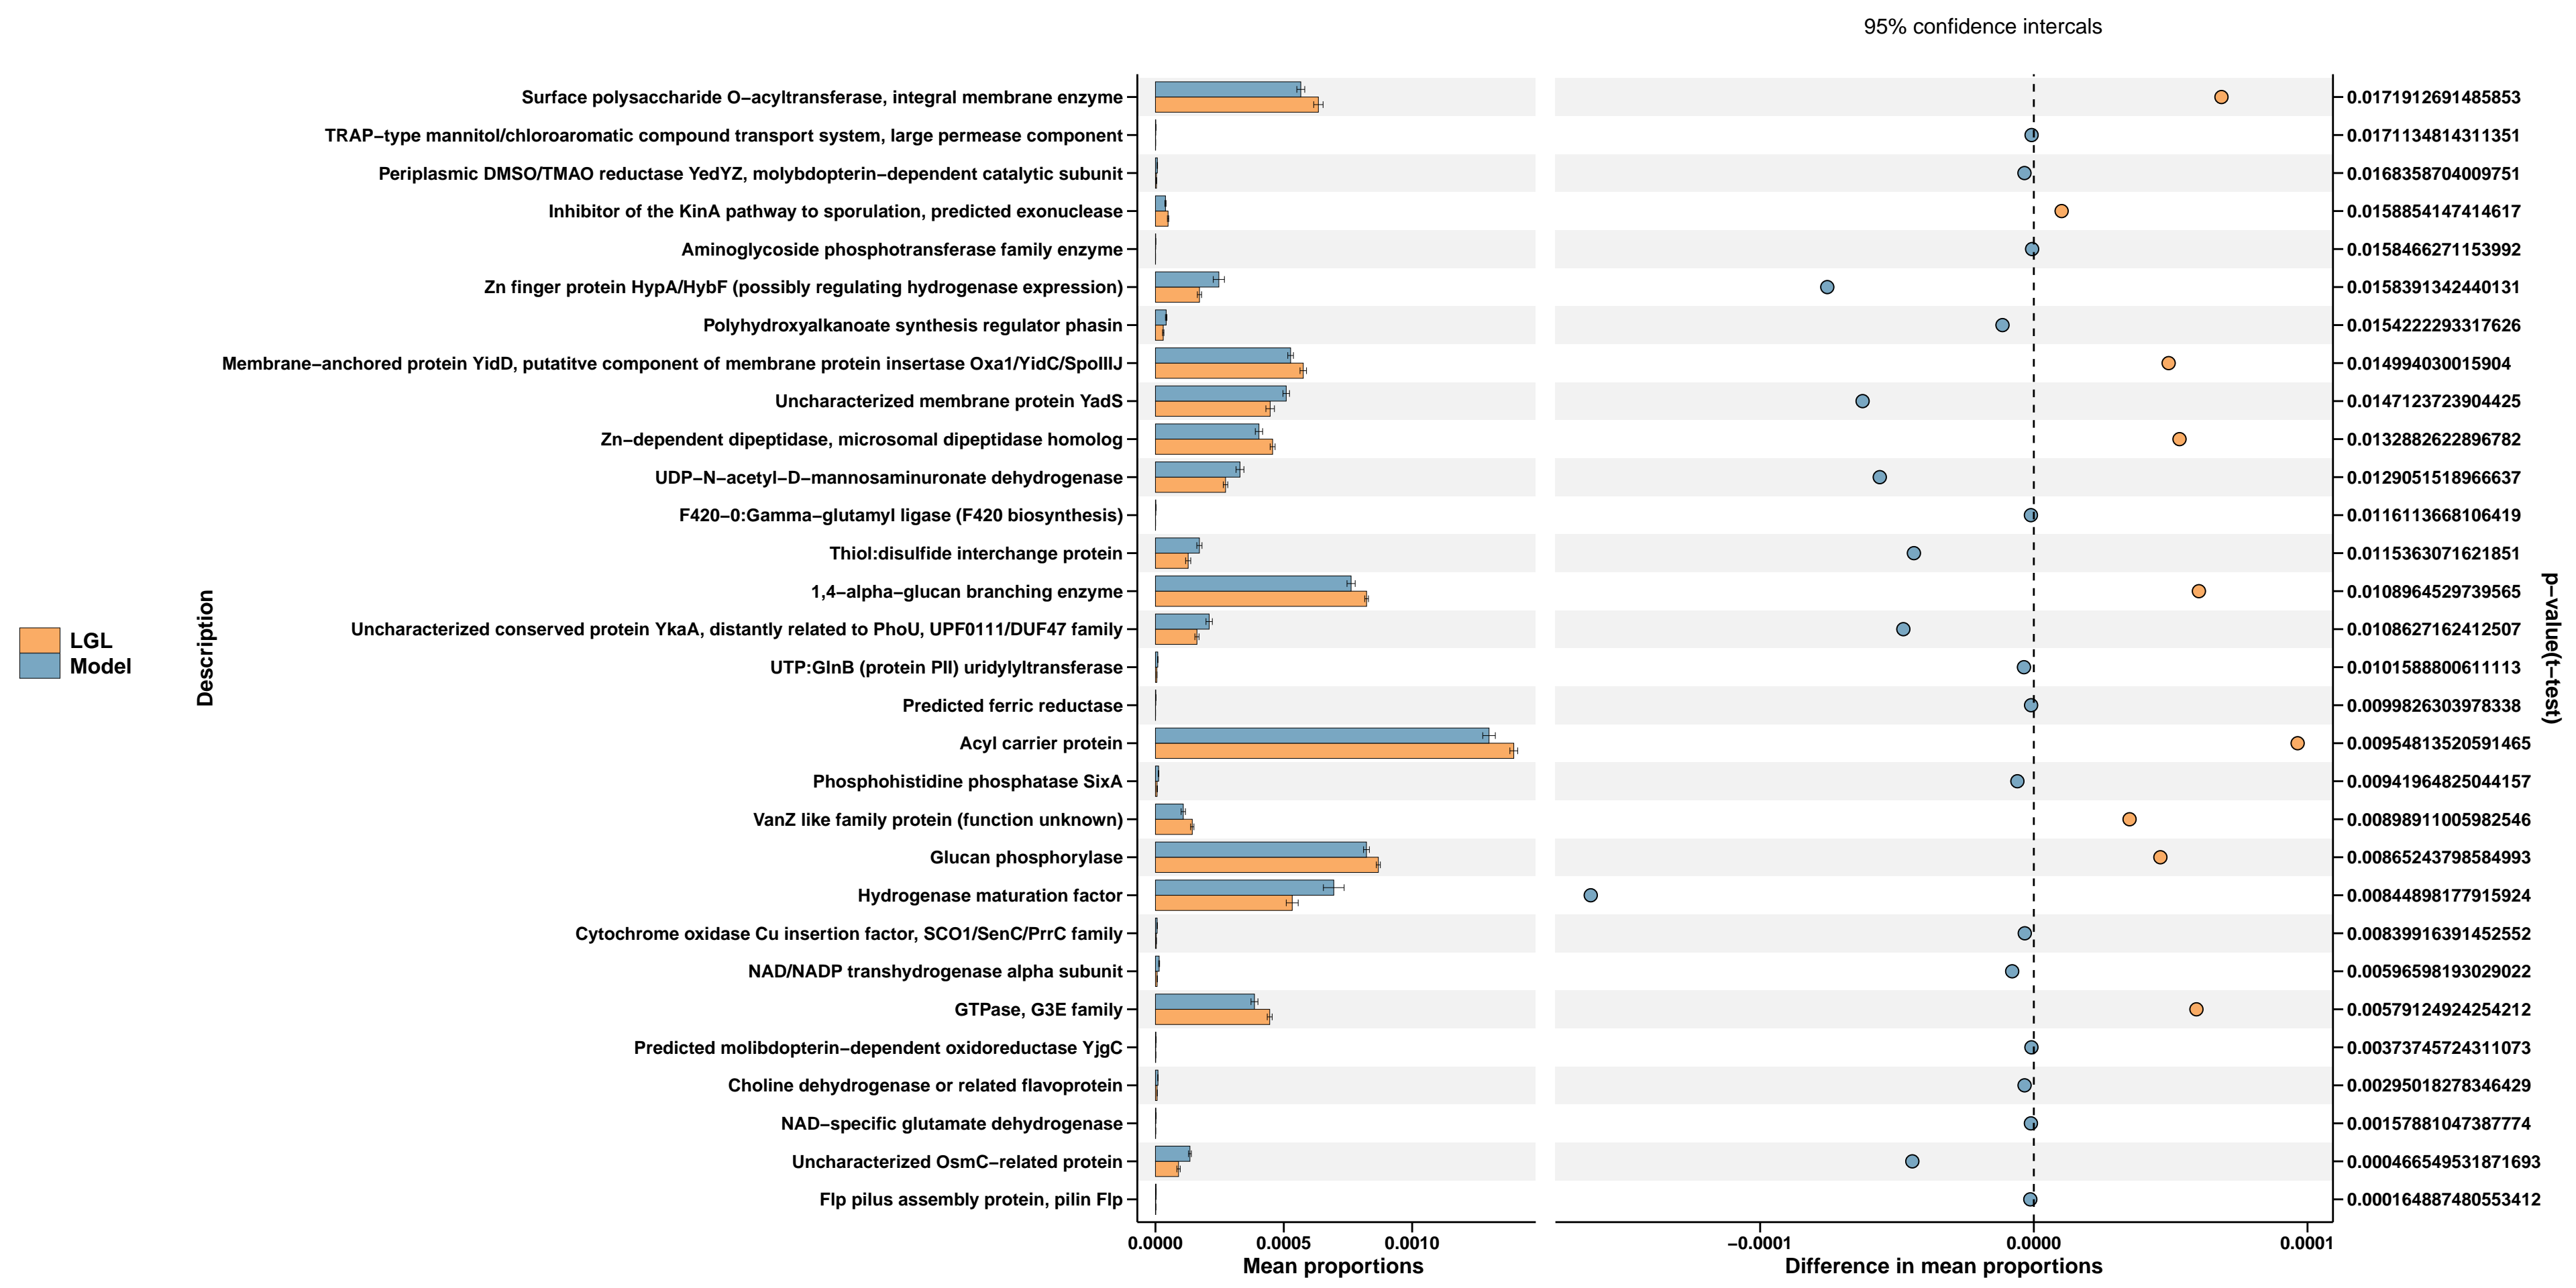

Supplement: f1 [file 6256450.f1.zip]

Model Normal

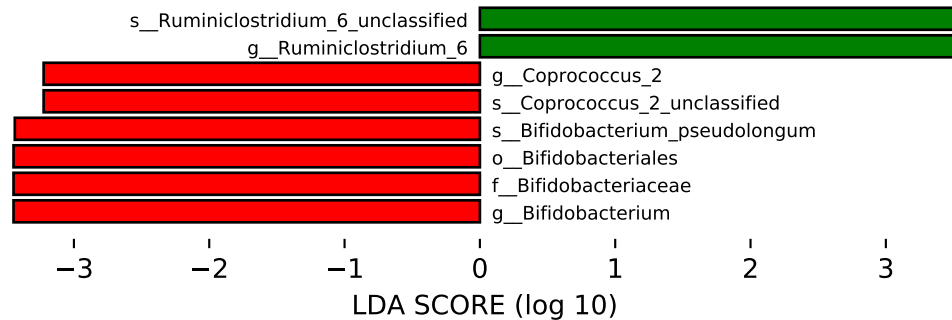

Supplement: f1 [file 6256450.f1.zip]

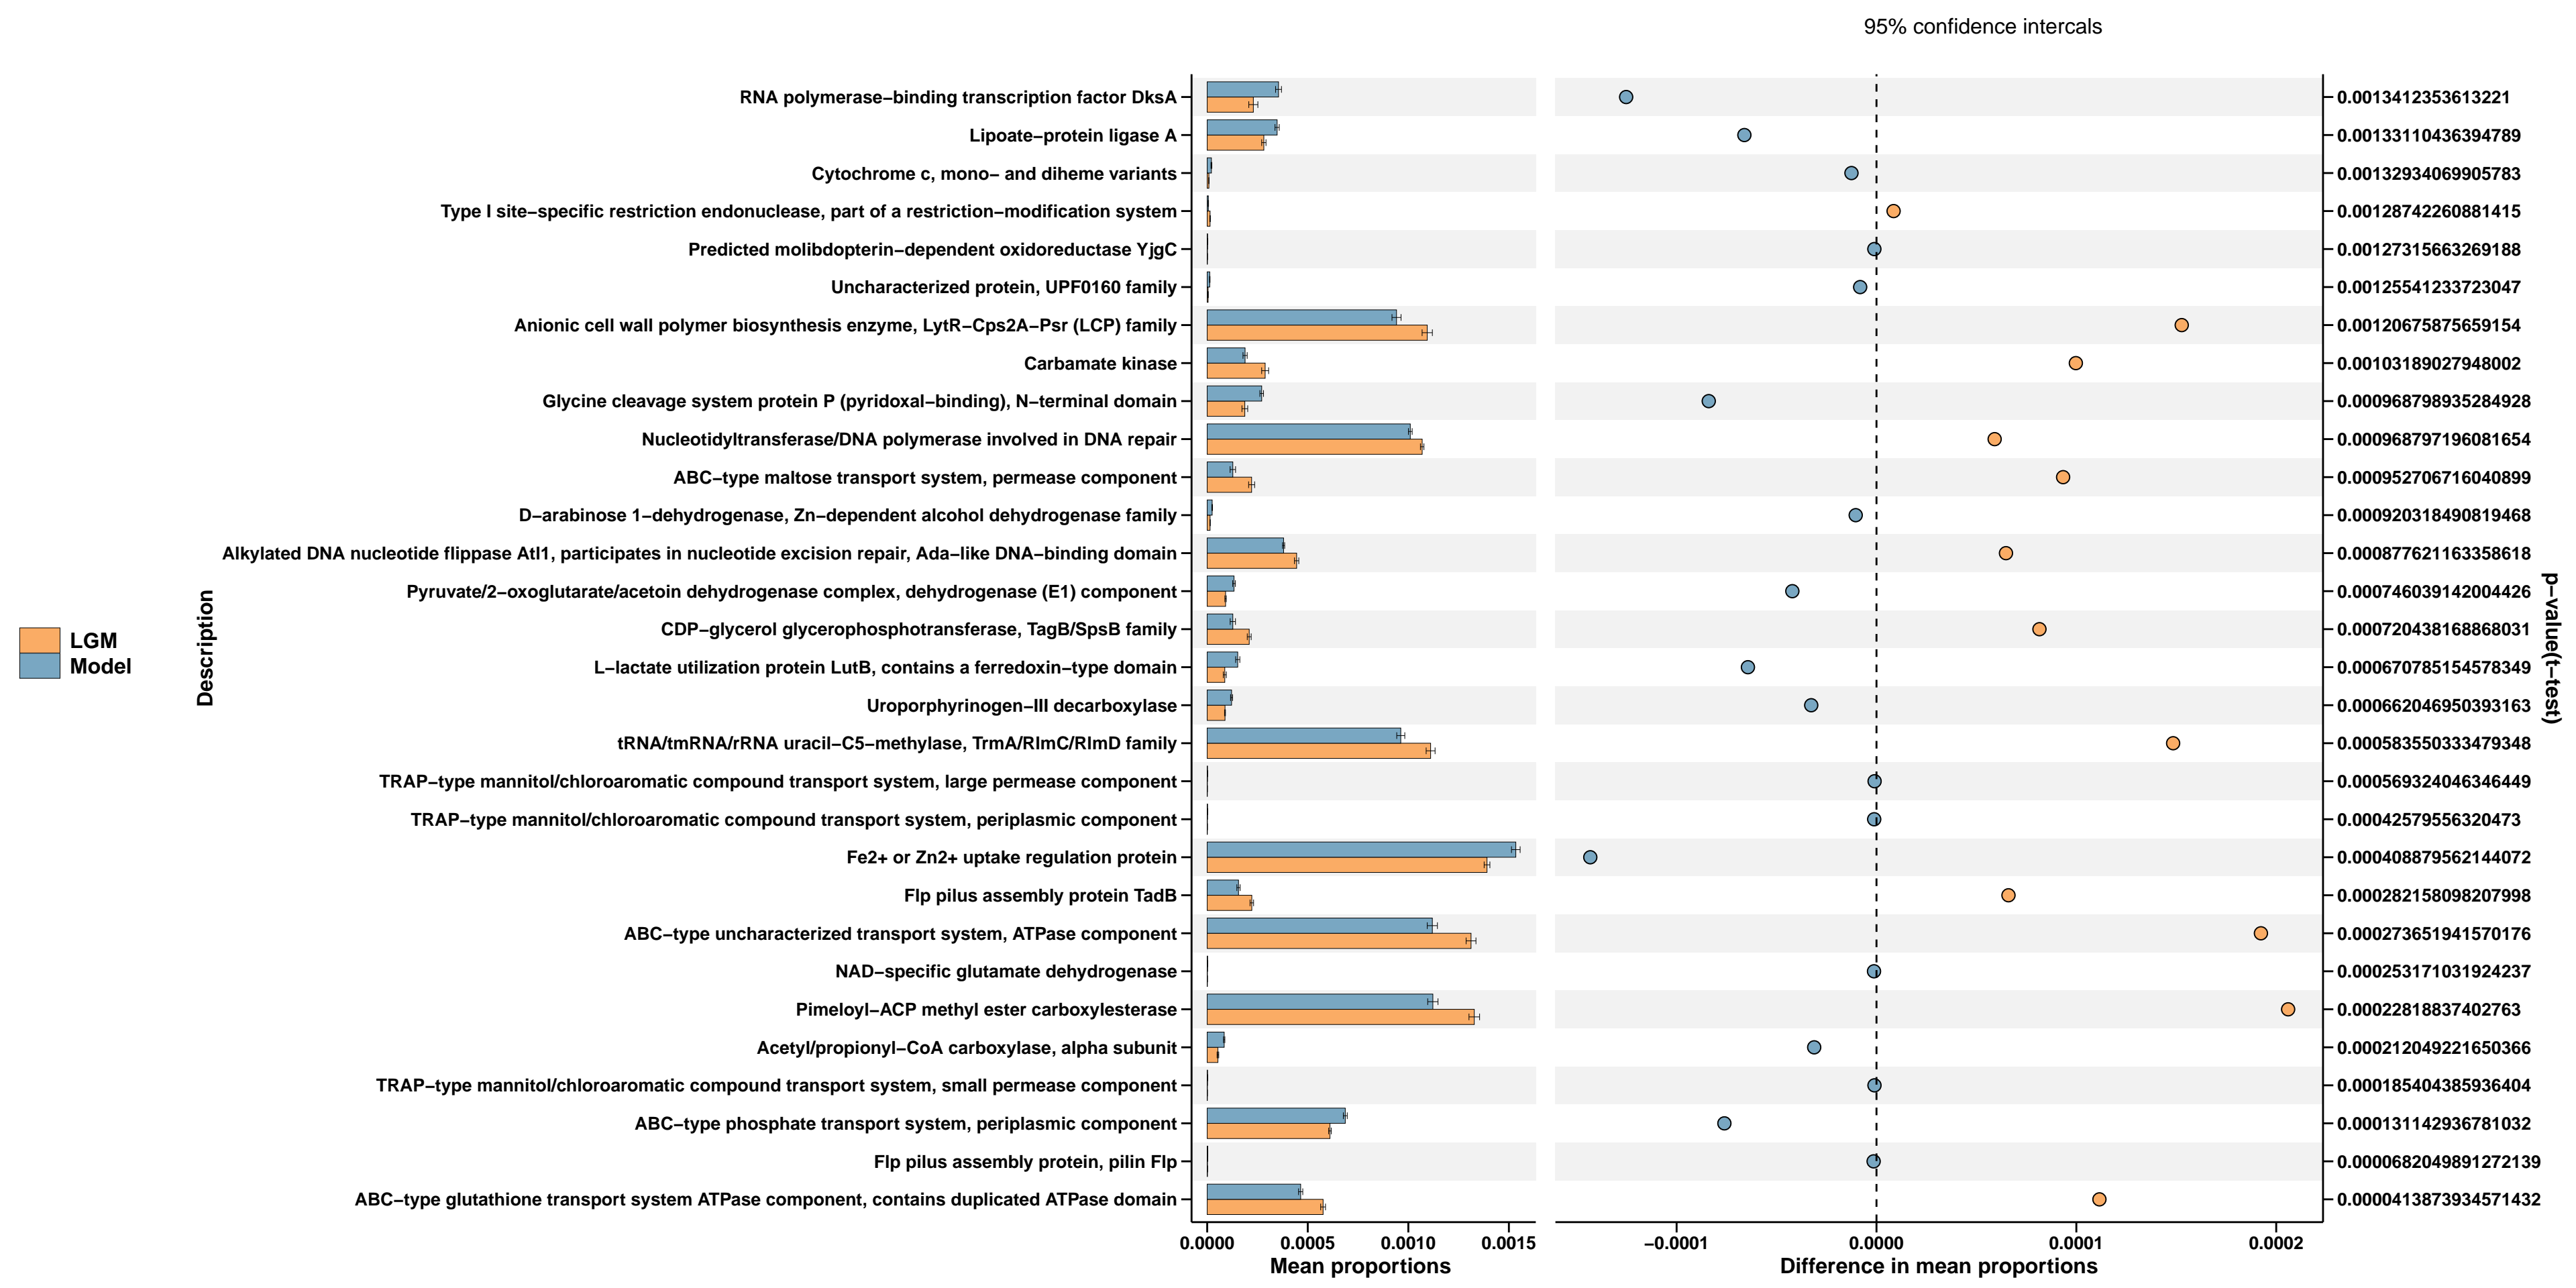

Supplement: f1 [file 6256450.f1.zip]

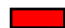

LGL

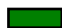

Model

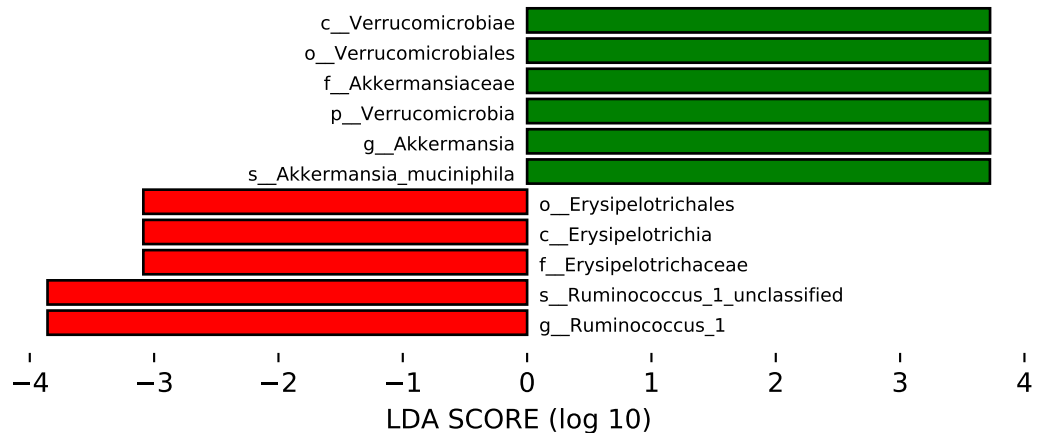

Supplement: f1 [file 6256450.f1.zip]

 BIFICO       Model

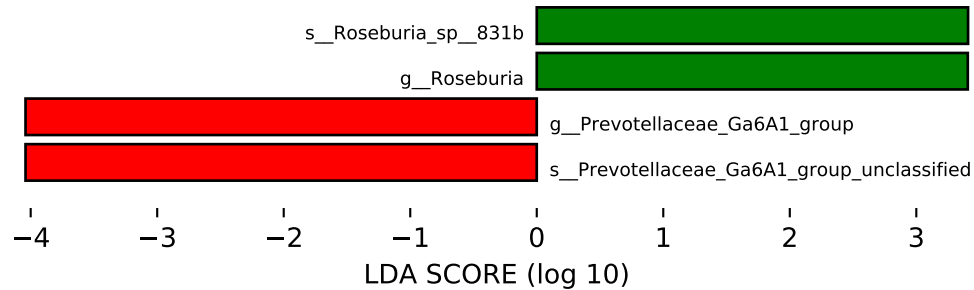

Supplement: f1 [file 6256450.f1.zip]

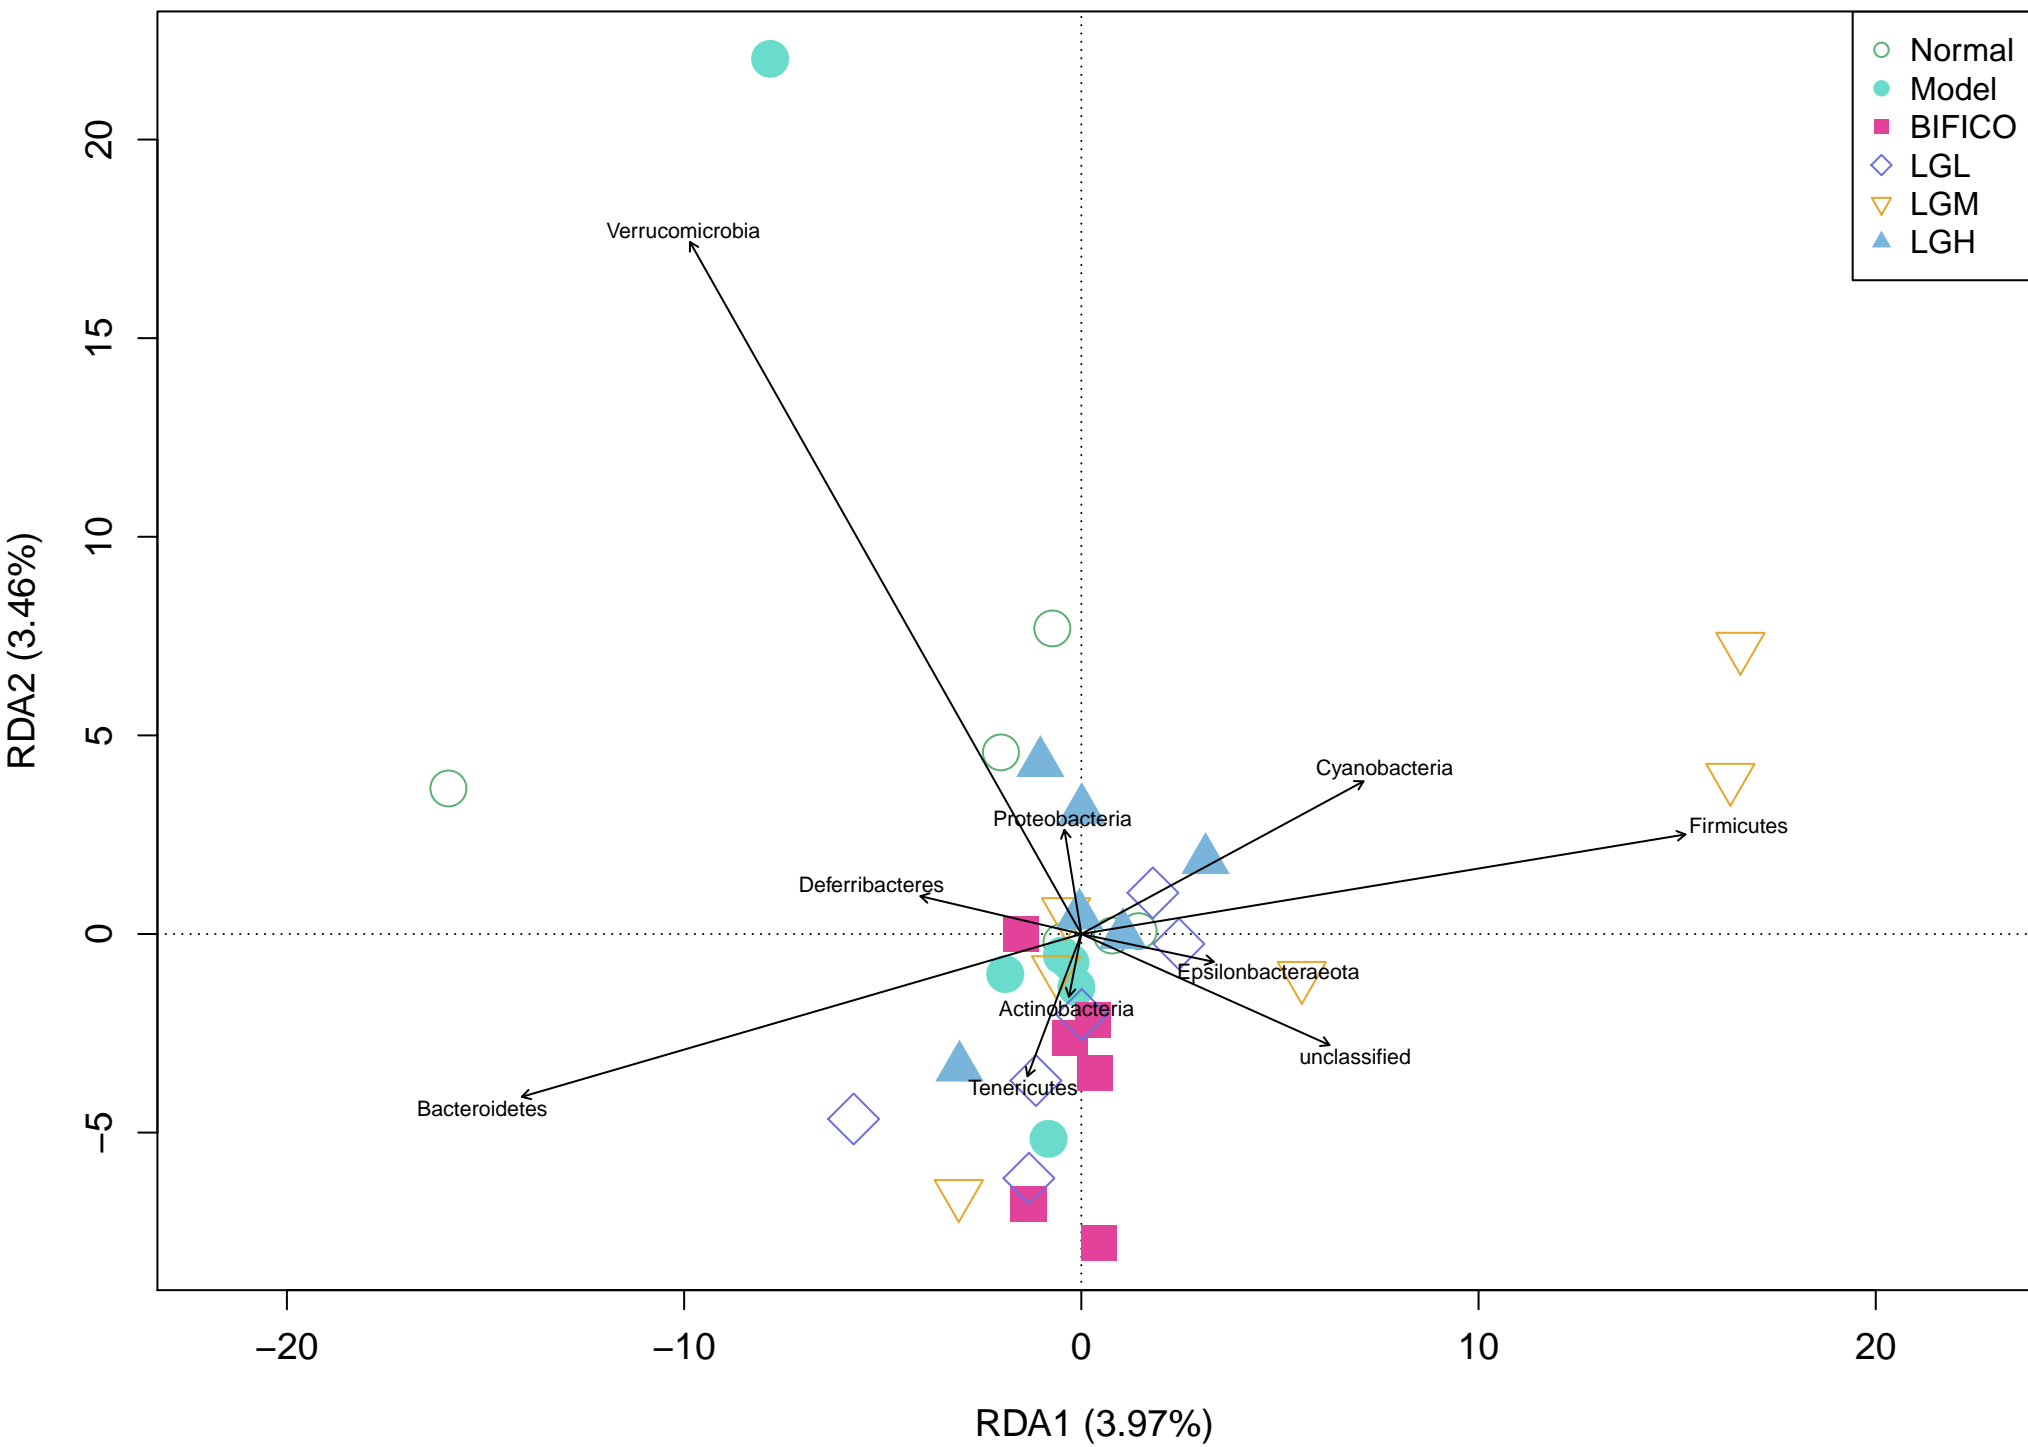

Supplement: f1 [file 6256450.f1.zip]

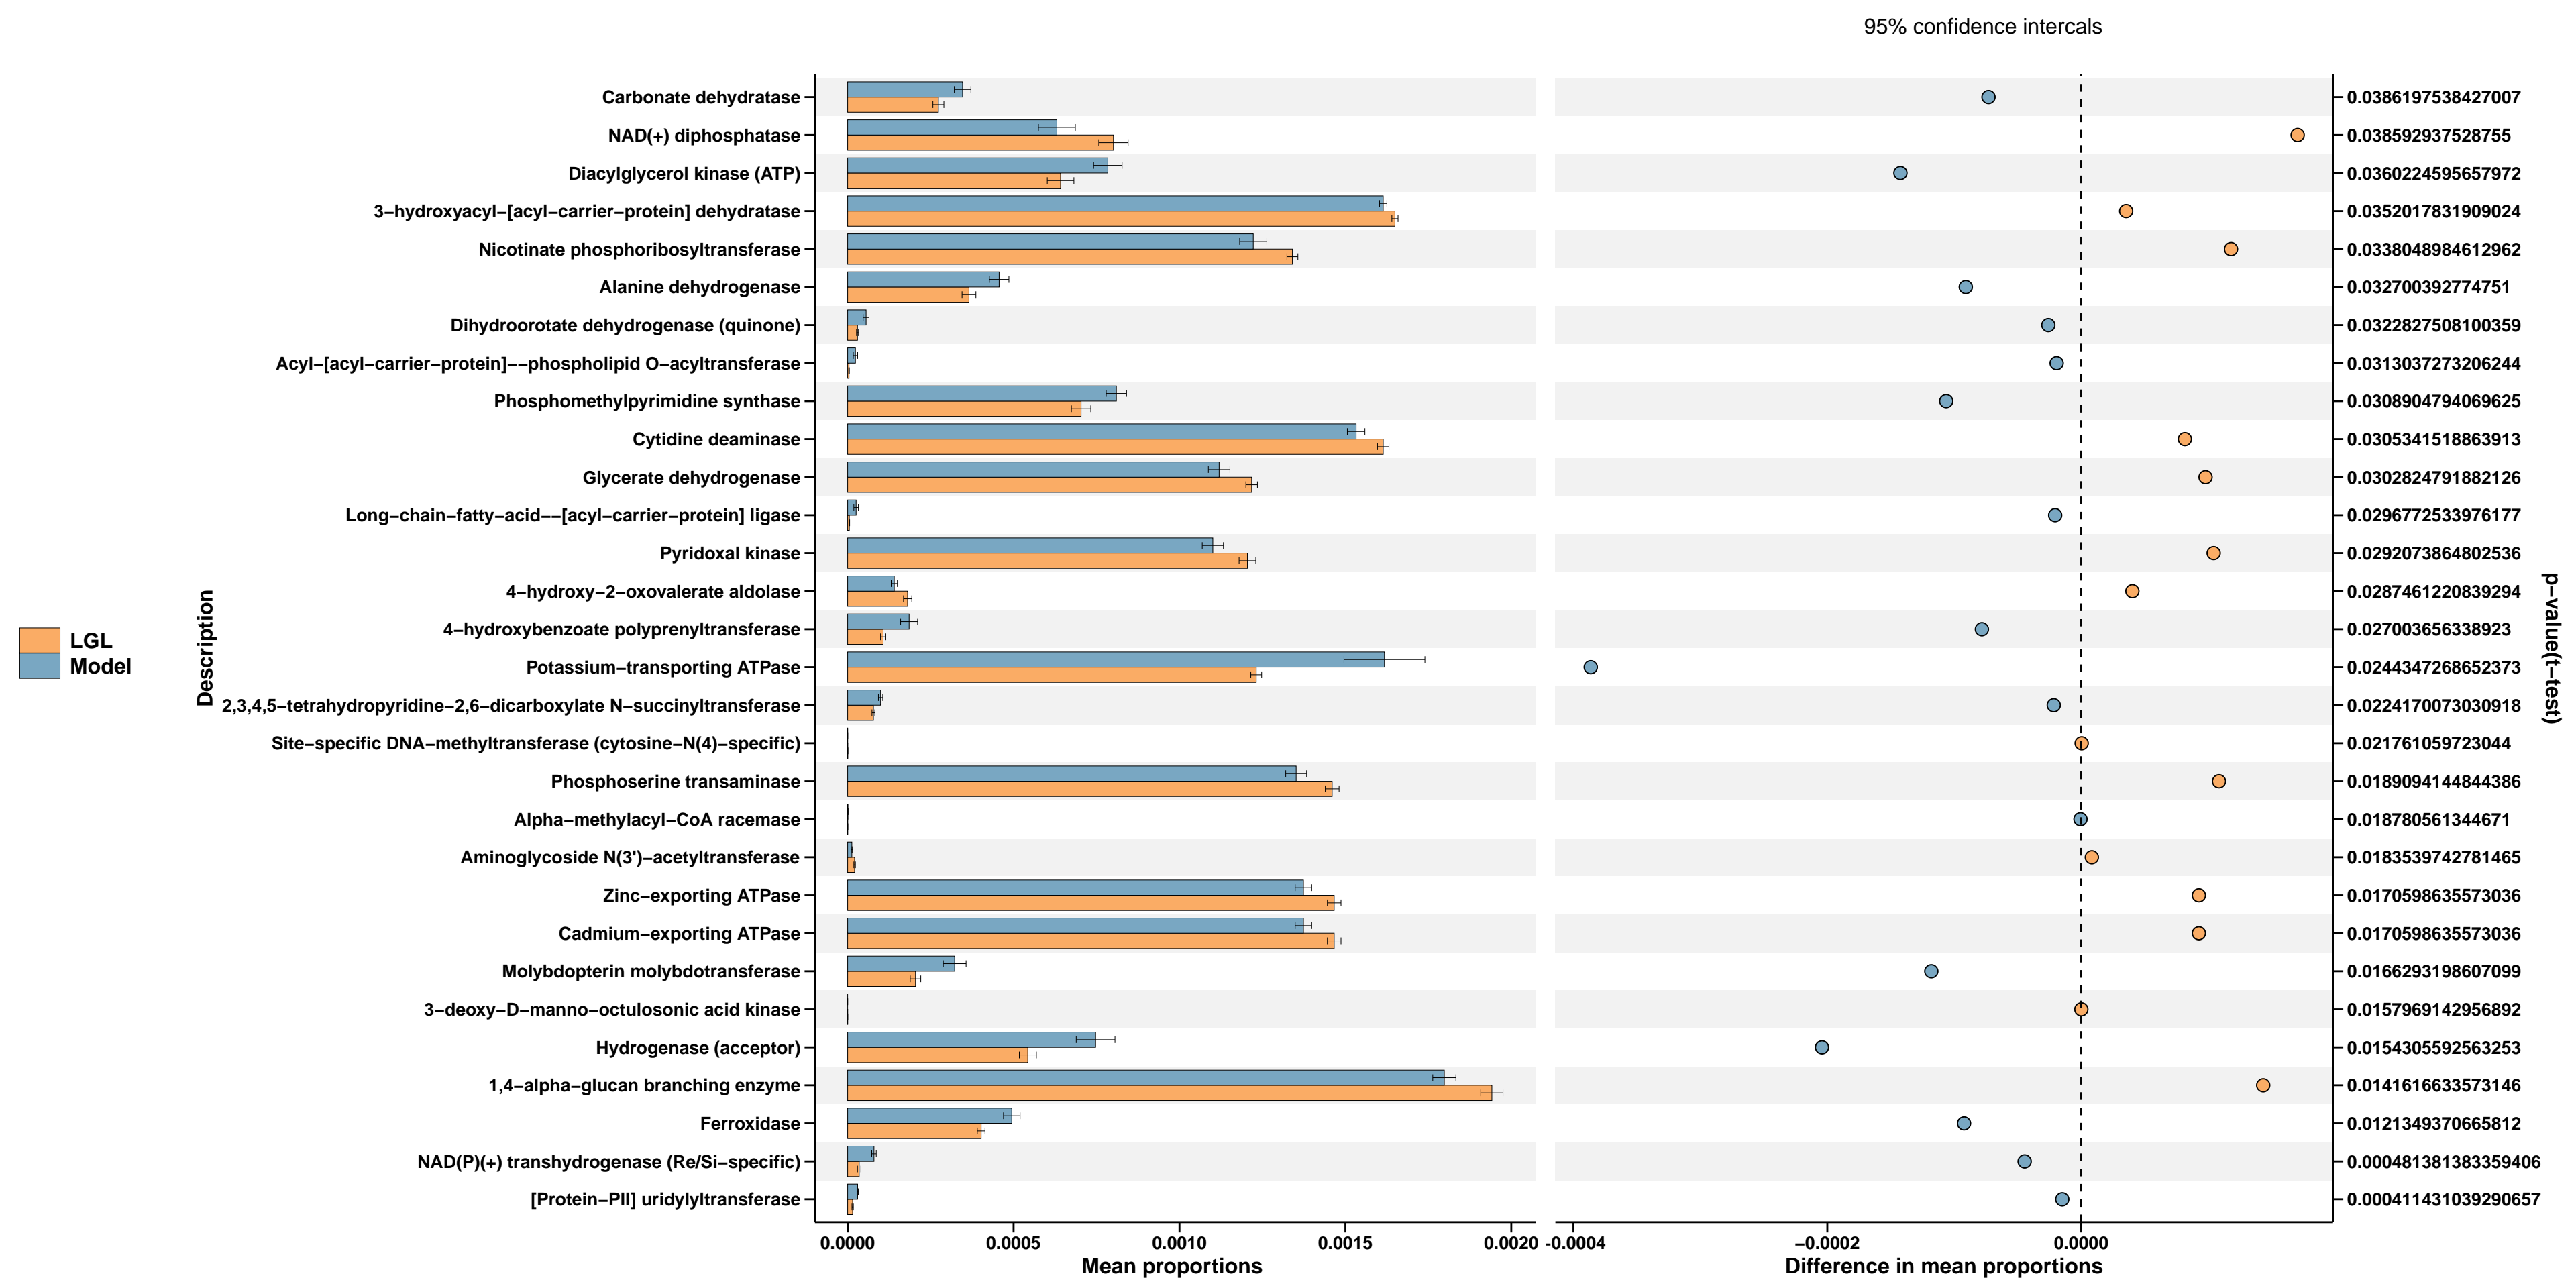

Supplement: f1 [file 6256450.f1.zip]

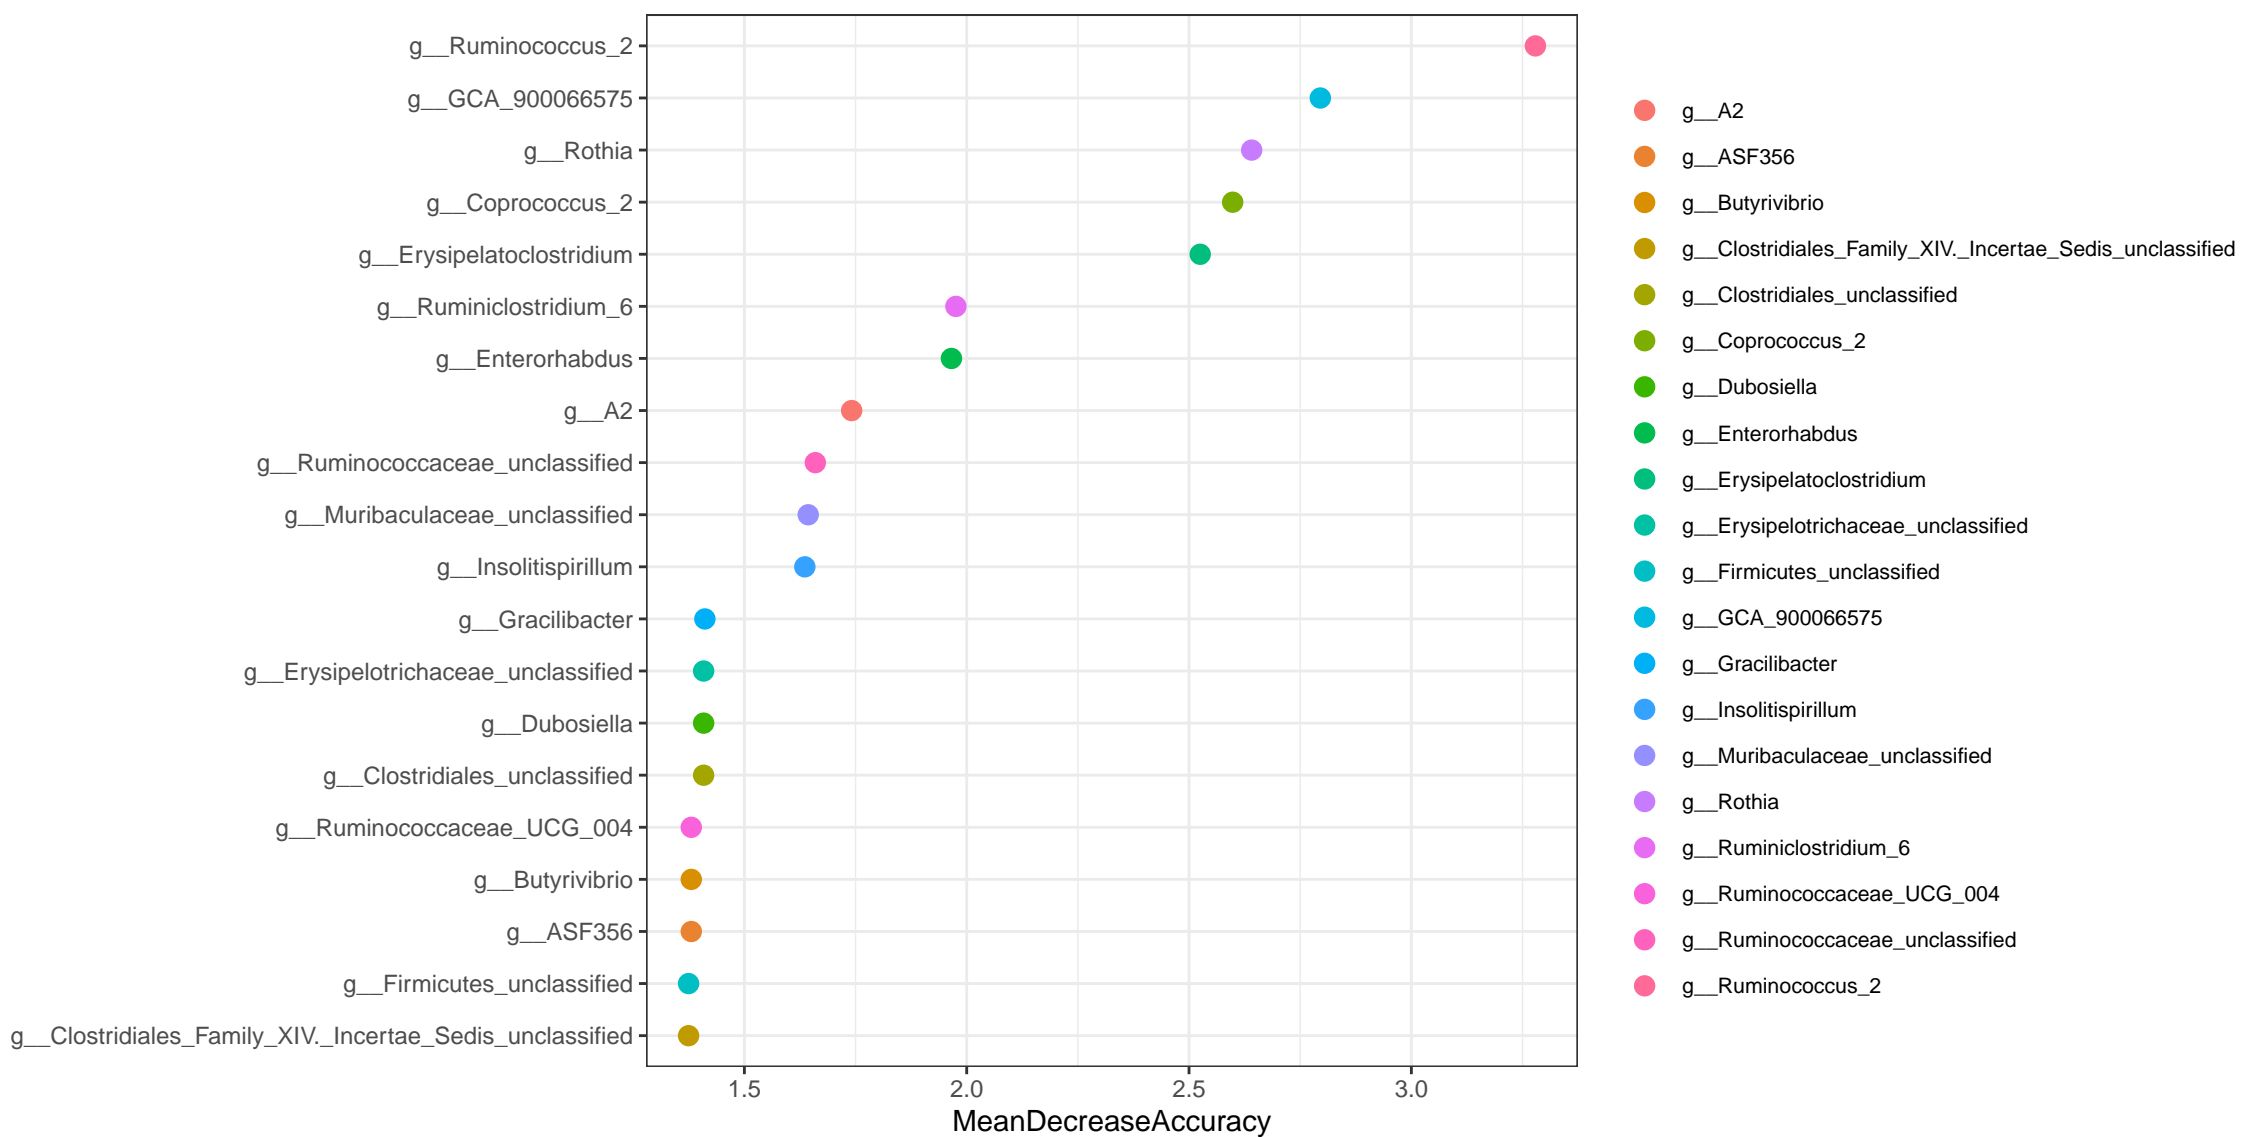

Supplement: f1 [file 6256450.f1.zip]

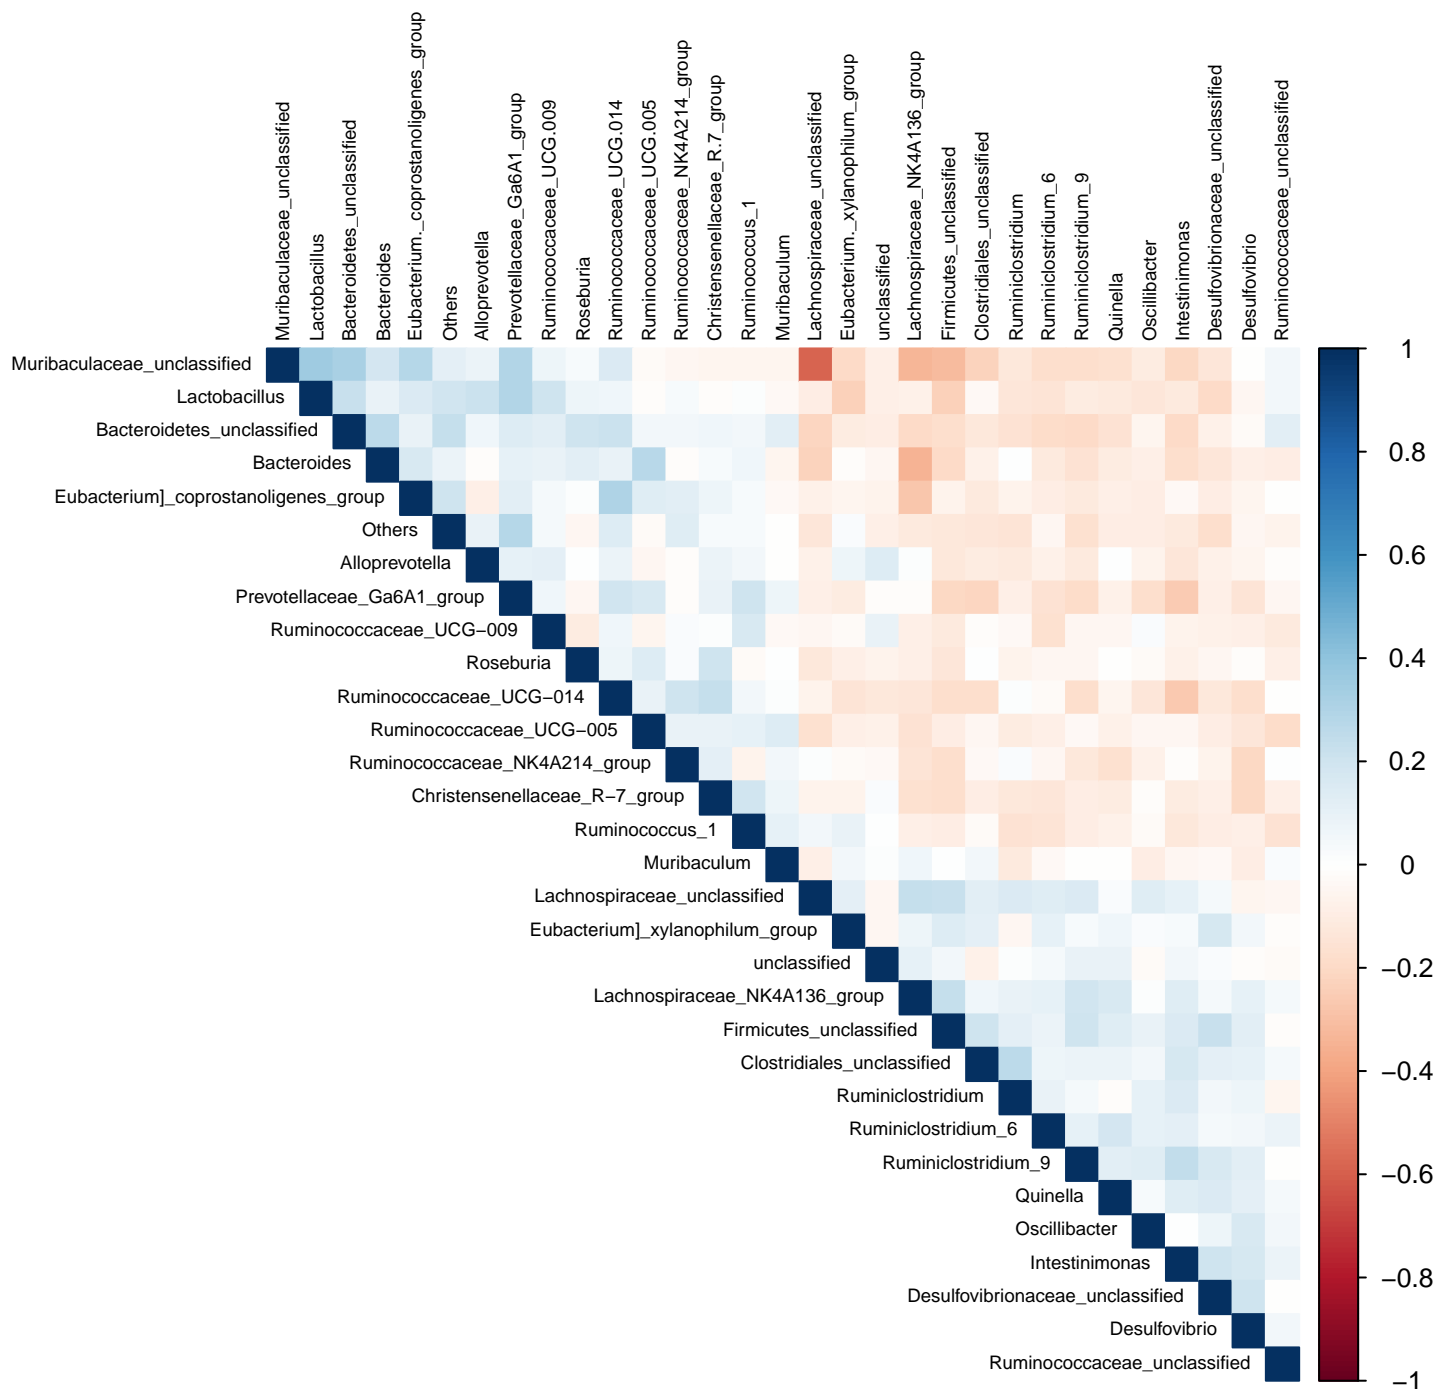

Supplement: f1 [file 6256450.f1.zip]

■ LGH    ■ Model

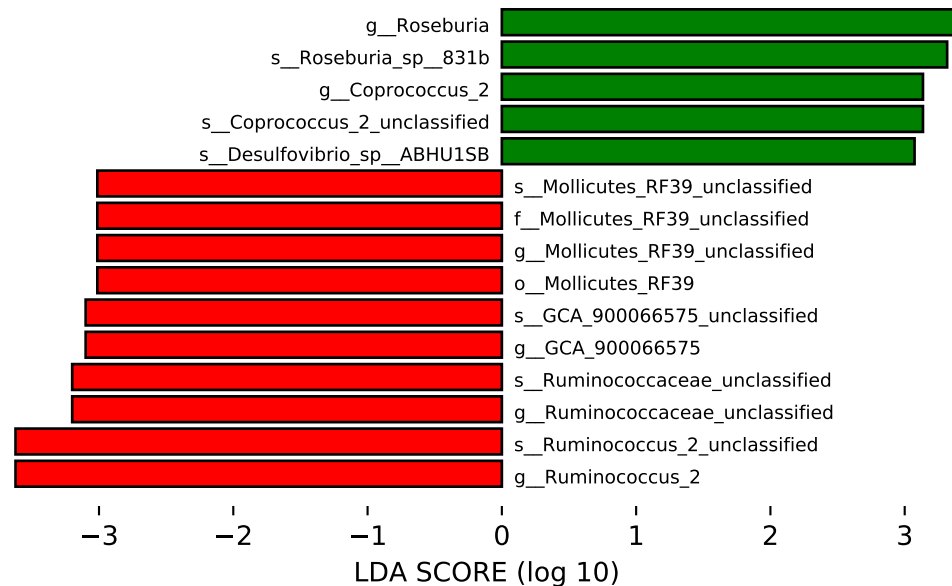

Supplement: f1 [file 6256450.f1.zip]

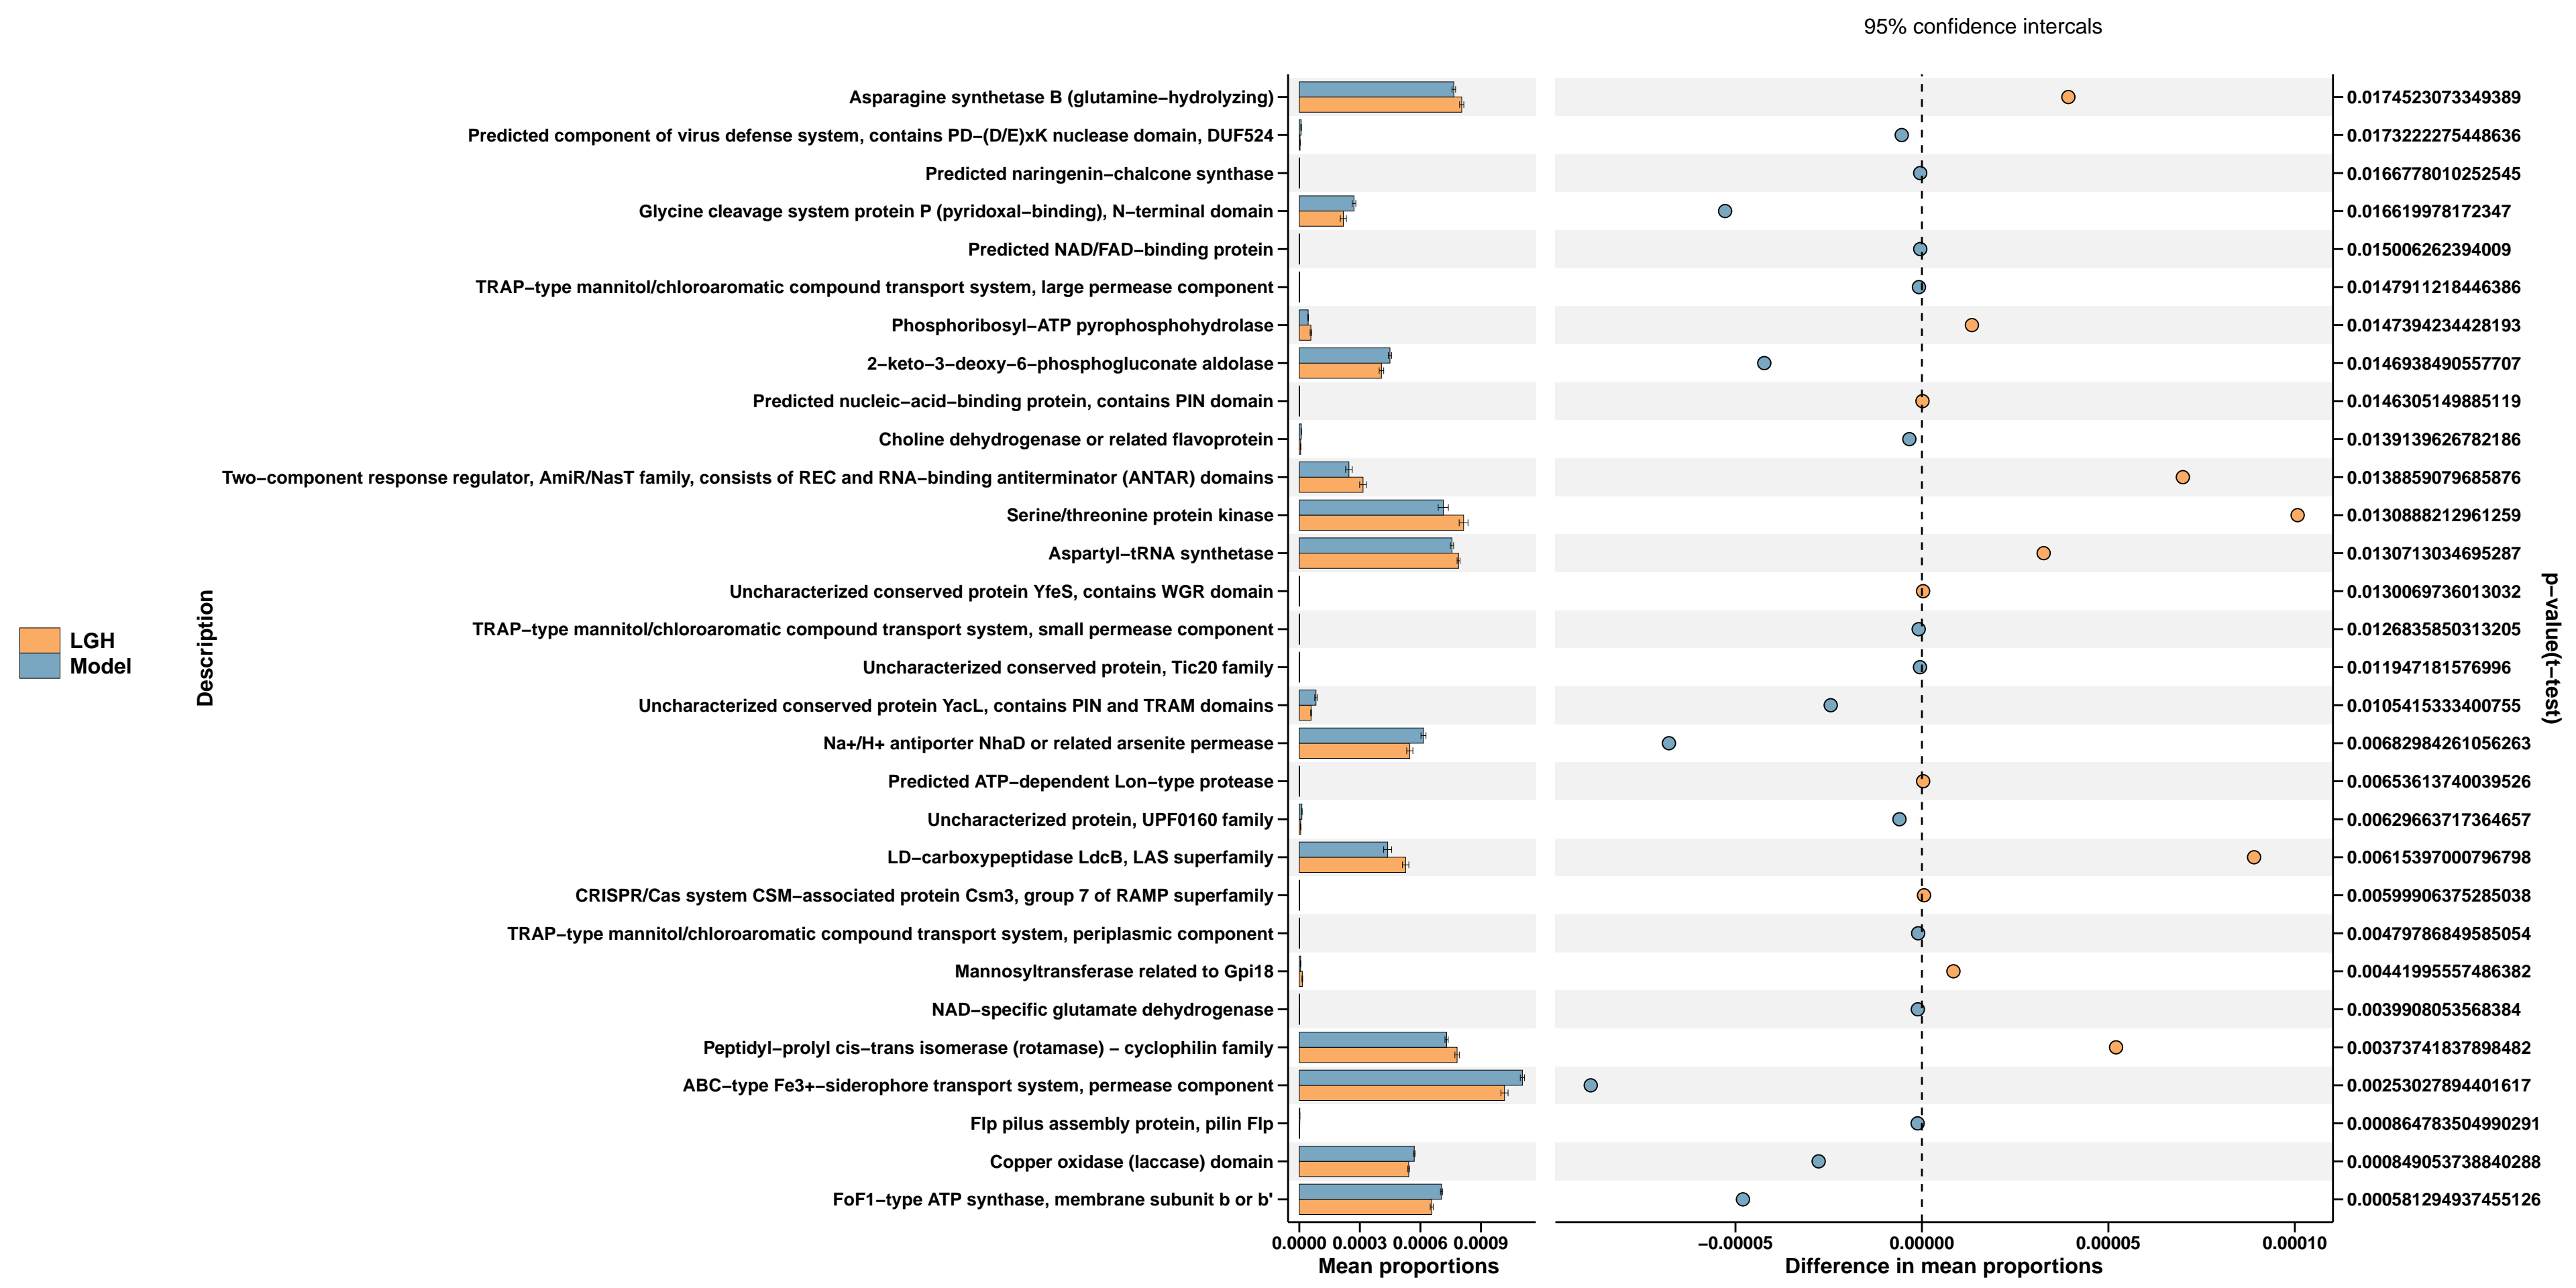

Supplement: f1 [file 6256450.f1.zip]

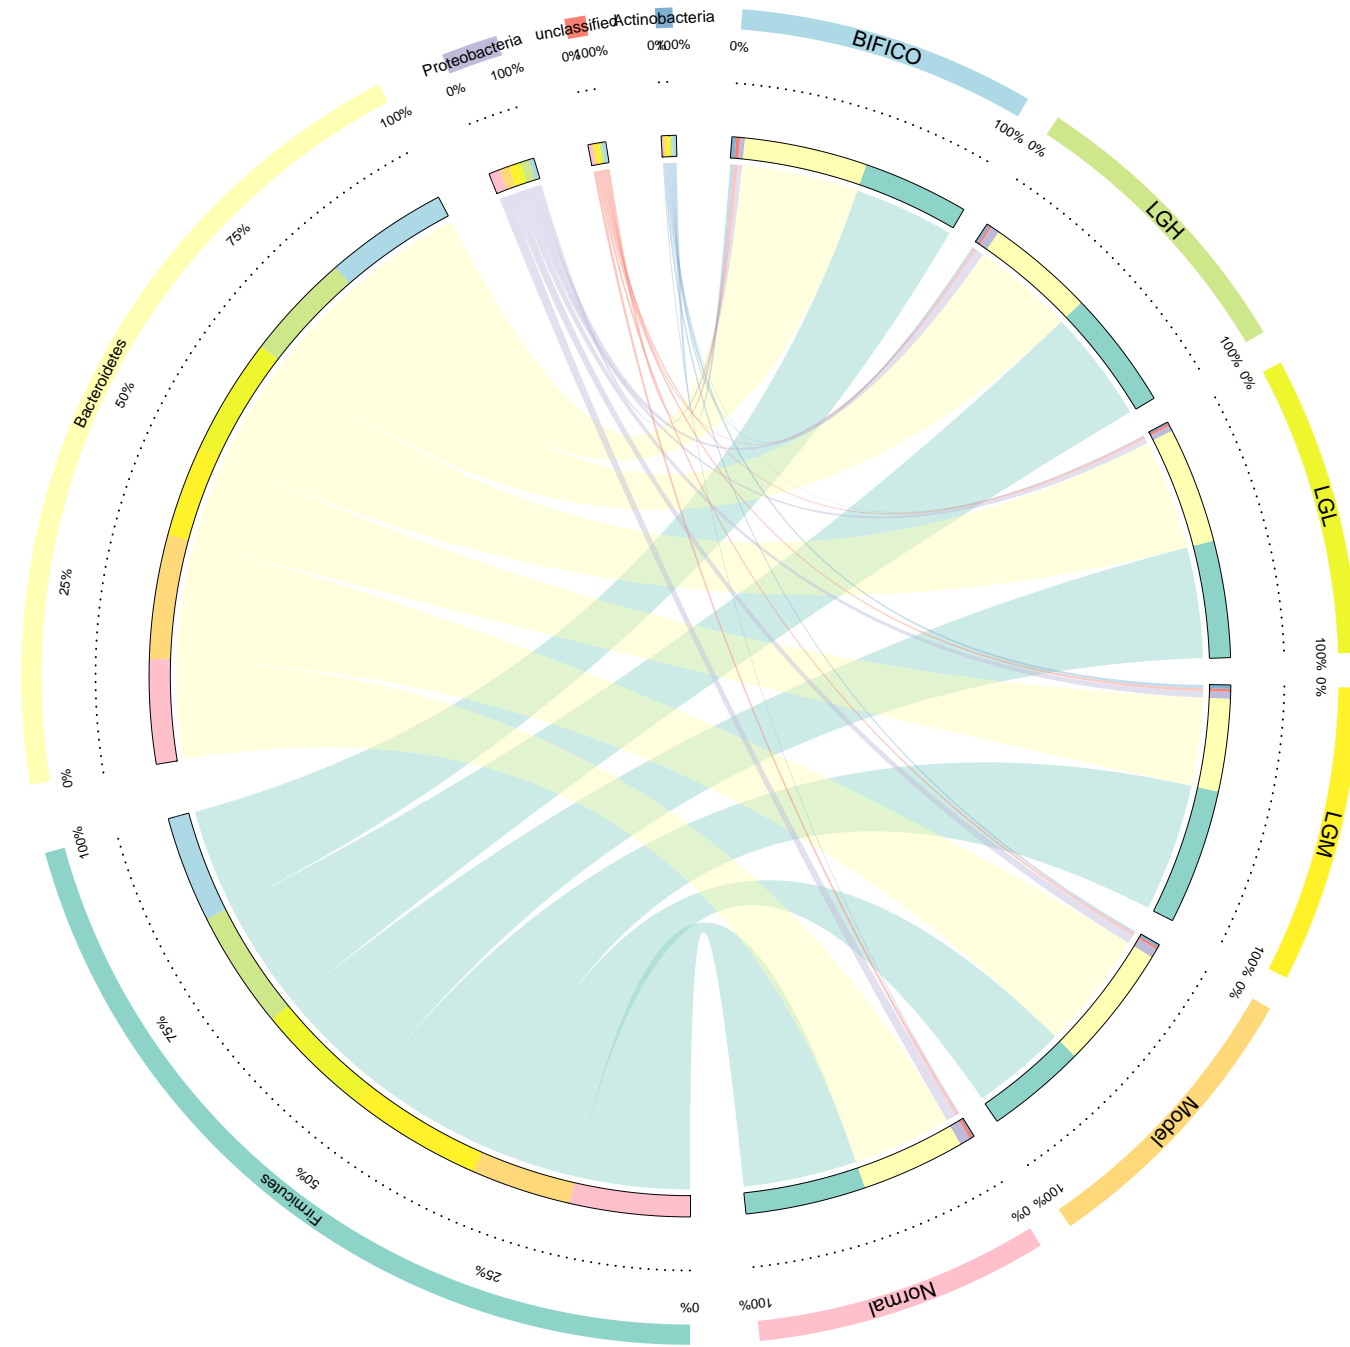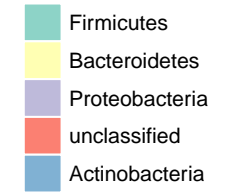

Supplement: f1 [file 6256450.f1.zip]
